# Supplementary material
Source: publisher figshare collection journal article supplement (https://acs.figshare.com/ndownloader/files/4381849)
Supplement: Supplementary file 1 [file 4381849]

data_str0569 
 
_audit_creation_method            SHELXL-97 
_chemical_name_systematic 
; 
 ? 
; 
_chemical_name_common             ? 
_chemical_melting_point           ? 
_chemical_formula_moiety          ? 
_chemical_formula_sum 
 'C31 H26 Fe2 O4 P2 S2' 
_chemical_formula_weight          700.28 
 
loop_ 
 _atom_type_symbol 
 _atom_type_description 
 _atom_type_scat_dispersion_real 
 _atom_type_scat_dispersion_imag 
 _atom_type_scat_source 
 'C'  'C'   0.0033   0.0016 
 'International Tables Vol C Tables 4.2.6.8 and 6.1.1.4' 
 'H'  'H'   0.0000   0.0000 
 'International Tables Vol C Tables 4.2.6.8 and 6.1.1.4' 
 'O'  'O'   0.0106   0.0060 
 'International Tables Vol C Tables 4.2.6.8 and 6.1.1.4' 
 'P'  'P'   0.1023   0.0942 
 'International Tables Vol C Tables 4.2.6.8 and 6.1.1.4' 
 'S'  'S'   0.1246   0.1234 
 'International Tables Vol C Tables 4.2.6.8 and 6.1.1.4' 
 'Fe'  'Fe'   0.3463   0.8444 
 'International Tables Vol C Tables 4.2.6.8 and 6.1.1.4' 
 
_symmetry_cell_setting            ? 
_symmetry_space_group_name_H-M    ? 
 
loop_ 
 _symmetry_equiv_pos_as_xyz 
 'x, y, z' 
 '-x, -y, z' 
 '-y, x, z+1/2' 
 'y, -x, z+1/2' 
 '-x+1/2, y+1/2, -z' 
 'x+1/2, -y+1/2, -z' 
 'y+1/2, x+1/2, -z+1/2' 
 '-y+1/2, -x+1/2, -z+1/2' 
 '-x, -y, -z' 
 'x, y, -z' 
 'y, -x, -z-1/2' 
 '-y, x, -z-1/2' 
 'x-1/2, -y-1/2, z' 
 '-x-1/2, y-1/2, z' 
 '-y-1/2, -x-1/2, z-1/2' 
 'y-1/2, x-1/2, z-1/2' 
 
_cell_length_a                    17.2280(13) 
_cell_length_b                    17.2280(13) 
_cell_length_c                    20.132(3) 
_cell_angle_alpha                 90.00 
_cell_angle_beta                  90.00 
_cell_angle_gamma                 90.00 
_cell_volume                      5975.1(11) 
_cell_formula_units_Z             8 
_cell_measurement_temperature     150(2) 
_cell_measurement_reflns_used     ? 
_cell_measurement_theta_min       ? 
_cell_measurement_theta_max       ? 
 
_exptl_crystal_description        ? 
_exptl_crystal_colour             ? 
_exptl_crystal_size_max           0.42 
_exptl_crystal_size_mid           0.42 
_exptl_crystal_size_min           0.36 
_exptl_crystal_density_meas       ? 
_exptl_crystal_density_diffrn     1.557 
_exptl_crystal_density_method     'not measured' 
_exptl_crystal_F_000              2864 
_exptl_absorpt_coefficient_mu     1.254 
_exptl_absorpt_correction_type    ? 
_exptl_absorpt_correction_T_min   0.6209 
_exptl_absorpt_correction_T_max   0.6609 
_exptl_absorpt_process_details    ? 
 
_exptl_special_details 
; 
 ? 
; 
 
_diffrn_ambient_temperature       150(2) 
_diffrn_radiation_wavelength      0.71073 
_diffrn_radiation_type            MoK\a 
_diffrn_radiation_source          'fine-focus sealed tube' 
_diffrn_radiation_monochromator   graphite 
_diffrn_measurement_device_type   ? 
_diffrn_measurement_method        ? 
_diffrn_detector_area_resol_mean  ? 
_diffrn_standards_number          ? 
_diffrn_standards_interval_count  ? 
_diffrn_standards_interval_time   ? 
_diffrn_standards_decay_%         ? 
_diffrn_reflns_number             48601 
_diffrn_reflns_av_R_equivalents   0.0477 
_diffrn_reflns_av_sigmaI/netI     0.0224 
_diffrn_reflns_limit_h_min        -22 
_diffrn_reflns_limit_h_max        22 
_diffrn_reflns_limit_k_min        -22 
_diffrn_reflns_limit_k_max        22 
_diffrn_reflns_limit_l_min        -25 
_diffrn_reflns_limit_l_max        26 
_diffrn_reflns_theta_min          3.11 
_diffrn_reflns_theta_max          28.29 
_reflns_number_total              3790 
_reflns_number_gt                 3492 
_reflns_threshold_expression      >2sigma(I) 
 
_computing_data_collection        ? 
_computing_cell_refinement        ? 
_computing_data_reduction         ? 
_computing_structure_solution     'SHELXS-97 (Sheldrick, 1990)' 
_computing_structure_refinement   'SHELXL-97 (Sheldrick, 1997)' 
_computing_molecular_graphics     ? 
_computing_publication_material   ? 
 
_refine_special_details 
; 
 Refinement of F^2^ against ALL reflections.  The weighted R-factor wR and 
 goodness of fit S are based on F^2^, conventional R-factors R are based 
 on F, with F set to zero for negative F^2^. The threshold expression of 
 F^2^ > 2sigma(F^2^) is used only for calculating R-factors(gt) etc. and is 
 not relevant to the choice of reflections for refinement.  R-factors based 
 on F^2^ are statistically about twice as large as those based on F, and R- 
 factors based on ALL data will be even larger. 
; 
 
_refine_ls_structure_factor_coef  Fsqd  
_refine_ls_matrix_type            full 
_refine_ls_weighting_scheme       calc  
_refine_ls_weighting_details 
 'calc w=1/[\s^2^(Fo^2^)+(0.0370P)^2^+2.8662P] where P=(Fo^2^+2Fc^2^)/3' 
_atom_sites_solution_primary      direct 
_atom_sites_solution_secondary    difmap 
_atom_sites_solution_hydrogens    geom 
_refine_ls_hydrogen_treatment     mixed 
_refine_ls_extinction_method      none 
_refine_ls_extinction_coef        ? 
_refine_ls_number_reflns          3790 
_refine_ls_number_parameters      247 
_refine_ls_number_restraints      0 
_refine_ls_R_factor_all           0.0298 
_refine_ls_R_factor_gt            0.0272 
_refine_ls_wR_factor_ref          0.0699 
_refine_ls_wR_factor_gt           0.0686 
_refine_ls_goodness_of_fit_ref    1.078 
_refine_ls_restrained_S_all       1.078 
_refine_ls_shift/su_max           0.002 
_refine_ls_shift/su_mean          0.000 
 
loop_ 
 _atom_site_label 
 _atom_site_type_symbol 
 _atom_site_fract_x 
 _atom_site_fract_y 
 _atom_site_fract_z 
 _atom_site_U_iso_or_equiv 
 _atom_site_adp_type 
 _atom_site_occupancy 
 _atom_site_symmetry_multiplicity 
 _atom_site_calc_flag 
 _atom_site_refinement_flags 
 _atom_site_disorder_assembly 
 _atom_site_disorder_group 
Fe1 Fe 0.441527(11) 0.223968(11) 0.061751(10) 0.01400(7) Uani 1 1 d . . . 
P1 P 0.568602(19) 0.231469(19) 0.077016(18) 0.01352(9) Uani 1 1 d . . . 
S1 S 0.46682(3) 0.11804(3) 0.0000 0.01508(10) Uani 1 2 d S . . 
S2 S 0.33350(3) 0.21831(3) 0.0000 0.01867(11) Uani 1 2 d S . . 
O1 O 0.39001(9) 0.17261(8) 0.19252(6) 0.0440(3) Uani 1 1 d . . . 
O2 O 0.41521(7) 0.38945(7) 0.08147(7) 0.0333(3) Uani 1 1 d . . . 
C1 C 0.41129(9) 0.19107(9) 0.14135(8) 0.0231(3) Uani 1 1 d . . . 
C2 C 0.42695(8) 0.32444(9) 0.07422(7) 0.0206(3) Uani 1 1 d . . . 
C3 C 0.37590(12) 0.06294(12) 0.0000 0.0215(4) Uani 1 2 d S . . 
C4 C 0.30606(13) 0.11550(13) 0.0000 0.0260(5) Uani 1 2 d S . . 
C5 C 0.61789(11) 0.26257(11) 0.0000 0.0154(4) Uani 1 2 d S . . 
C6 C 0.61829(8) 0.14327(8) 0.10475(7) 0.0166(3) Uani 1 1 d . . . 
C7 C 0.57752(9) 0.09087(9) 0.14448(8) 0.0224(3) Uani 1 1 d . . . 
C8 C 0.61465(10) 0.02669(9) 0.17194(8) 0.0252(3) Uani 1 1 d . . . 
C9 C 0.69198(10) 0.01283(9) 0.15868(8) 0.0261(3) Uani 1 1 d . . . 
C10 C 0.73242(9) 0.06324(10) 0.11775(10) 0.0298(4) Uani 1 1 d . . . 
C11 C 0.69625(9) 0.12893(9) 0.09192(8) 0.0244(3) Uani 1 1 d . . . 
C12 C 0.60212(8) 0.30361(8) 0.13757(6) 0.0170(3) Uani 1 1 d . . . 
C13 C 0.63091(10) 0.28133(9) 0.19954(8) 0.0247(3) Uani 1 1 d . . . 
C14 C 0.64869(11) 0.33682(10) 0.24757(8) 0.0308(4) Uani 1 1 d . . . 
C15 C 0.63704(10) 0.41466(10) 0.23503(8) 0.0274(3) Uani 1 1 d . . . 
C16 C 0.60831(9) 0.43784(9) 0.17381(8) 0.0249(3) Uani 1 1 d . . . 
C17 C 0.59146(8) 0.38283(8) 0.12518(8) 0.0205(3) Uani 1 1 d . . . 
H3 H 0.3765(11) 0.0318(11) 0.0375(9) 0.027(5) Uiso 1 1 d . . . 
H4 H 0.2747(13) 0.1093(13) 0.0386(11) 0.045(6) Uiso 1 1 d . . . 
H5 H 0.6136(14) 0.3180(15) 0.0000 0.016(6) Uiso 1 2 d S . . 
H6 H 0.6702(16) 0.2530(15) 0.0000 0.024(6) Uiso 1 2 d S . . 
H7 H 0.5281(12) 0.1008(11) 0.1552(9) 0.027(5) Uiso 1 1 d . . . 
H8 H 0.5871(12) -0.0057(12) 0.1974(10) 0.033(5) Uiso 1 1 d . . . 
H9 H 0.7151(12) -0.0276(13) 0.1779(11) 0.031(5) Uiso 1 1 d . . . 
H10 H 0.7842(12) 0.0552(11) 0.1083(10) 0.033(5) Uiso 1 1 d . . . 
H11 H 0.7239(12) 0.1625(13) 0.0654(10) 0.034(6) Uiso 1 1 d . . . 
H13 H 0.6386(11) 0.2296(12) 0.2089(10) 0.029(5) Uiso 1 1 d . . . 
H14 H 0.6706(12) 0.3190(12) 0.2882(11) 0.040(6) Uiso 1 1 d . . . 
H15 H 0.6488(11) 0.4519(11) 0.2678(10) 0.028(5) Uiso 1 1 d . . . 
H16 H 0.5968(12) 0.4914(12) 0.1665(9) 0.029(5) Uiso 1 1 d . . . 
H17 H 0.5706(11) 0.3983(11) 0.0829(10) 0.025(5) Uiso 1 1 d . . . 
 
loop_ 
 _atom_site_aniso_label 
 _atom_site_aniso_U_11 
 _atom_site_aniso_U_22 
 _atom_site_aniso_U_33 
 _atom_site_aniso_U_23 
 _atom_site_aniso_U_13 
 _atom_site_aniso_U_12 
Fe1 0.01255(10) 0.01632(11) 0.01312(11) -0.00058(7) 0.00140(6) -0.00009(6) 
P1 0.01366(16) 0.01537(17) 0.01152(16) 0.00026(12) -0.00062(12) -0.00059(11) 
S1 0.0142(2) 0.0160(2) 0.0150(2) 0.000 0.000 -0.00039(16) 
S2 0.0117(2) 0.0219(2) 0.0224(2) 0.000 0.000 0.00062(16) 
O1 0.0635(9) 0.0404(7) 0.0282(7) 0.0078(5) 0.0235(6) 0.0029(6) 
O2 0.0303(6) 0.0236(6) 0.0461(7) -0.0084(5) -0.0007(5) 0.0060(5) 
C1 0.0254(7) 0.0209(7) 0.0229(7) -0.0007(6) 0.0059(6) 0.0004(5) 
C2 0.0169(6) 0.0242(7) 0.0207(7) -0.0026(6) -0.0001(5) 0.0003(5) 
C3 0.0203(10) 0.0203(10) 0.0238(10) 0.000 0.000 -0.0065(7) 
C4 0.0173(10) 0.0238(11) 0.0368(12) 0.000 0.000 -0.0060(8) 
C5 0.0143(9) 0.0187(9) 0.0133(8) 0.000 0.000 -0.0028(7) 
C6 0.0186(6) 0.0165(6) 0.0147(6) -0.0001(5) -0.0039(5) 0.0000(5) 
C7 0.0207(7) 0.0221(7) 0.0245(7) 0.0046(6) 0.0027(6) 0.0020(5) 
C8 0.0309(8) 0.0222(7) 0.0226(7) 0.0061(6) -0.0008(6) -0.0007(6) 
C9 0.0279(8) 0.0210(7) 0.0294(8) 0.0038(6) -0.0106(6) 0.0032(6) 
C10 0.0180(7) 0.0287(8) 0.0428(10) 0.0060(7) -0.0038(7) 0.0029(6) 
C11 0.0178(7) 0.0241(7) 0.0314(8) 0.0063(6) -0.0017(6) -0.0014(6) 
C12 0.0164(6) 0.0203(6) 0.0143(6) -0.0012(5) 0.0006(5) -0.0030(5) 
C13 0.0328(8) 0.0230(7) 0.0183(7) 0.0004(6) -0.0059(6) -0.0032(6) 
C14 0.0404(9) 0.0346(9) 0.0173(7) -0.0018(6) -0.0075(7) -0.0089(7) 
C15 0.0317(8) 0.0287(8) 0.0218(7) -0.0090(6) 0.0025(6) -0.0110(6) 
C16 0.0277(8) 0.0202(7) 0.0268(8) -0.0037(6) 0.0042(6) -0.0056(6) 
C17 0.0215(7) 0.0215(7) 0.0185(7) -0.0001(5) 0.0000(5) -0.0029(5) 
 
_geom_special_details 
; 
 All esds (except the esd in the dihedral angle between two l.s. planes) 
 are estimated using the full covariance matrix.  The cell esds are taken 
 into account individually in the estimation of esds in distances, angles 
 and torsion angles; correlations between esds in cell parameters are only 
 used when they are defined by crystal symmetry.  An approximate (isotropic) 
 treatment of cell esds is used for estimating esds involving l.s. planes. 
; 
 
loop_ 
 _geom_bond_atom_site_label_1 
 _geom_bond_atom_site_label_2 
 _geom_bond_distance 
 _geom_bond_site_symmetry_2 
 _geom_bond_publ_flag 
Fe1 C2 1.7670(15) . ? 
Fe1 C1 1.7778(15) . ? 
Fe1 P1 2.2145(4) . ? 
Fe1 S2 2.2403(5) . ? 
Fe1 S1 2.2507(5) . ? 
Fe1 Fe1 2.4863(5) 10 ? 
P1 C6 1.8313(14) . ? 
P1 C12 1.8341(14) . ? 
P1 C5 1.8472(11) . ? 
S1 C3 1.832(2) . ? 
S1 Fe1 2.2507(5) 10 ? 
S2 C4 1.833(2) . ? 
S2 Fe1 2.2403(5) 10 ? 
O1 C1 1.139(2) . ? 
O2 C2 1.1475(19) . ? 
C3 C4 1.506(3) . ? 
C5 P1 1.8472(11) 10 ? 
C6 C11 1.390(2) . ? 
C6 C7 1.3957(19) . ? 
C7 C8 1.392(2) . ? 
C8 C9 1.379(2) . ? 
C9 C10 1.385(2) . ? 
C10 C11 1.392(2) . ? 
C12 C13 1.396(2) . ? 
C12 C17 1.399(2) . ? 
C13 C14 1.394(2) . ? 
C14 C15 1.379(2) . ? 
C15 C16 1.387(2) . ? 
C16 C17 1.393(2) . ? 
 
loop_ 
 _geom_angle_atom_site_label_1 
 _geom_angle_atom_site_label_2 
 _geom_angle_atom_site_label_3 
 _geom_angle 
 _geom_angle_site_symmetry_1 
 _geom_angle_site_symmetry_3 
 _geom_angle_publ_flag 
C2 Fe1 C1 98.20(7) . . ? 
C2 Fe1 P1 93.65(5) . . ? 
C1 Fe1 P1 100.55(5) . . ? 
C2 Fe1 S2 90.20(5) . . ? 
C1 Fe1 S2 104.06(5) . . ? 
P1 Fe1 S2 154.270(15) . . ? 
C2 Fe1 S1 154.19(5) . . ? 
C1 Fe1 S1 107.22(5) . . ? 
P1 Fe1 S1 86.132(16) . . ? 
S2 Fe1 S1 79.576(17) . . ? 
C2 Fe1 Fe1 98.17(5) . 10 ? 
C1 Fe1 Fe1 154.34(5) . 10 ? 
P1 Fe1 Fe1 97.977(11) . 10 ? 
S2 Fe1 Fe1 56.296(9) . 10 ? 
S1 Fe1 Fe1 56.472(9) . 10 ? 
C6 P1 C12 102.27(6) . . ? 
C6 P1 C5 106.37(8) . . ? 
C12 P1 C5 102.51(7) . . ? 
C6 P1 Fe1 117.13(5) . . ? 
C12 P1 Fe1 116.30(5) . . ? 
C5 P1 Fe1 110.79(6) . . ? 
C3 S1 Fe1 104.75(6) . . ? 
C3 S1 Fe1 104.75(6) . 10 ? 
Fe1 S1 Fe1 67.057(19) . 10 ? 
C4 S2 Fe1 104.85(6) . 10 ? 
C4 S2 Fe1 104.85(6) . . ? 
Fe1 S2 Fe1 67.409(19) 10 . ? 
O1 C1 Fe1 177.18(15) . . ? 
O2 C2 Fe1 177.85(14) . . ? 
C4 C3 S1 111.82(15) . . ? 
C3 C4 S2 112.03(15) . . ? 
P1 C5 P1 114.15(10) 10 . ? 
C11 C6 C7 118.55(13) . . ? 
C11 C6 P1 122.86(11) . . ? 
C7 C6 P1 118.43(11) . . ? 
C8 C7 C6 120.66(14) . . ? 
C9 C8 C7 120.31(15) . . ? 
C8 C9 C10 119.48(15) . . ? 
C9 C10 C11 120.44(15) . . ? 
C6 C11 C10 120.49(14) . . ? 
C13 C12 C17 118.28(13) . . ? 
C13 C12 P1 121.29(11) . . ? 
C17 C12 P1 120.07(11) . . ? 
C14 C13 C12 120.63(15) . . ? 
C15 C14 C13 120.51(15) . . ? 
C14 C15 C16 119.65(14) . . ? 
C15 C16 C17 120.19(15) . . ? 
C16 C17 C12 120.73(14) . . ? 
 
loop_ 
 _geom_torsion_atom_site_label_1 
 _geom_torsion_atom_site_label_2 
 _geom_torsion_atom_site_label_3 
 _geom_torsion_atom_site_label_4 
 _geom_torsion 
 _geom_torsion_site_symmetry_1 
 _geom_torsion_site_symmetry_2 
 _geom_torsion_site_symmetry_3 
 _geom_torsion_site_symmetry_4 
 _geom_torsion_publ_flag 
C2 Fe1 P1 C6 155.31(7) . . . . ? 
C1 Fe1 P1 C6 56.26(7) . . . . ? 
S2 Fe1 P1 C6 -106.63(6) . . . . ? 
S1 Fe1 P1 C6 -50.56(5) . . . . ? 
Fe1 Fe1 P1 C6 -105.91(5) 10 . . . ? 
C2 Fe1 P1 C12 34.01(7) . . . . ? 
C1 Fe1 P1 C12 -65.04(7) . . . . ? 
S2 Fe1 P1 C12 132.07(6) . . . . ? 
S1 Fe1 P1 C12 -171.85(5) . . . . ? 
Fe1 Fe1 P1 C12 132.79(5) 10 . . . ? 
C2 Fe1 P1 C5 -82.47(8) . . . . ? 
C1 Fe1 P1 C5 178.48(8) . . . . ? 
S2 Fe1 P1 C5 15.58(8) . . . . ? 
S1 Fe1 P1 C5 71.66(7) . . . . ? 
Fe1 Fe1 P1 C5 16.31(6) 10 . . . ? 
C2 Fe1 S1 C3 -111.89(12) . . . . ? 
C1 Fe1 S1 C3 57.88(7) . . . . ? 
P1 Fe1 S1 C3 157.73(4) . . . . ? 
S2 Fe1 S1 C3 -43.75(4) . . . . ? 
Fe1 Fe1 S1 C3 -100.05(4) 10 . . . ? 
C2 Fe1 S1 Fe1 -11.84(11) . . . 10 ? 
C1 Fe1 S1 Fe1 157.92(5) . . . 10 ? 
P1 Fe1 S1 Fe1 -102.219(13) . . . 10 ? 
S2 Fe1 S1 Fe1 56.294(13) . . . 10 ? 
C2 Fe1 S2 C4 -160.12(6) . . . . ? 
C1 Fe1 S2 C4 -61.61(7) . . . . ? 
P1 Fe1 S2 C4 101.05(6) . . . . ? 
S1 Fe1 S2 C4 43.72(4) . . . . ? 
Fe1 Fe1 S2 C4 100.19(4) 10 . . . ? 
C2 Fe1 S2 Fe1 99.70(5) . . . 10 ? 
C1 Fe1 S2 Fe1 -161.80(5) . . . 10 ? 
P1 Fe1 S2 Fe1 0.86(5) . . . 10 ? 
S1 Fe1 S2 Fe1 -56.470(13) . . . 10 ? 
C2 Fe1 C1 O1 28(3) . . . . ? 
P1 Fe1 C1 O1 123(3) . . . . ? 
S2 Fe1 C1 O1 -65(3) . . . . ? 
S1 Fe1 C1 O1 -148(3) . . . . ? 
Fe1 Fe1 C1 O1 -102(3) 10 . . . ? 
C1 Fe1 C2 O2 -94(4) . . . . ? 
P1 Fe1 C2 O2 165(4) . . . . ? 
S2 Fe1 C2 O2 11(4) . . . . ? 
S1 Fe1 C2 O2 77(4) . . . . ? 
Fe1 Fe1 C2 O2 67(4) 10 . . . ? 
Fe1 S1 C3 C4 34.832(15) . . . . ? 
Fe1 S1 C3 C4 -34.832(15) 10 . . . ? 
S1 C3 C4 S2 0.0 . . . . ? 
Fe1 S2 C4 C3 35.035(16) 10 . . . ? 
Fe1 S2 C4 C3 -35.035(16) . . . . ? 
C6 P1 C5 P1 97.53(11) . . . 10 ? 
C12 P1 C5 P1 -155.49(10) . . . 10 ? 
Fe1 P1 C5 P1 -30.77(12) . . . 10 ? 
C12 P1 C6 C11 -77.65(13) . . . . ? 
C5 P1 C6 C11 29.50(14) . . . . ? 
Fe1 P1 C6 C11 153.97(11) . . . . ? 
C12 P1 C6 C7 97.67(12) . . . . ? 
C5 P1 C6 C7 -155.18(11) . . . . ? 
Fe1 P1 C6 C7 -30.71(13) . . . . ? 
C11 C6 C7 C8 1.5(2) . . . . ? 
P1 C6 C7 C8 -174.00(12) . . . . ? 
C6 C7 C8 C9 -1.8(2) . . . . ? 
C7 C8 C9 C10 -0.1(3) . . . . ? 
C8 C9 C10 C11 2.2(3) . . . . ? 
C7 C6 C11 C10 0.6(2) . . . . ? 
P1 C6 C11 C10 175.91(13) . . . . ? 
C9 C10 C11 C6 -2.5(3) . . . . ? 
C6 P1 C12 C13 -21.52(14) . . . . ? 
C5 P1 C12 C13 -131.61(13) . . . . ? 
Fe1 P1 C12 C13 107.39(12) . . . . ? 
C6 P1 C12 C17 165.42(11) . . . . ? 
C5 P1 C12 C17 55.33(13) . . . . ? 
Fe1 P1 C12 C17 -65.67(12) . . . . ? 
C17 C12 C13 C14 -0.2(2) . . . . ? 
P1 C12 C13 C14 -173.37(13) . . . . ? 
C12 C13 C14 C15 1.0(3) . . . . ? 
C13 C14 C15 C16 -0.8(3) . . . . ? 
C14 C15 C16 C17 -0.1(2) . . . . ? 
C15 C16 C17 C12 0.9(2) . . . . ? 
C13 C12 C17 C16 -0.7(2) . . . . ? 
P1 C12 C17 C16 172.52(11) . . . . ? 
 
_diffrn_measured_fraction_theta_max    0.990 
_diffrn_reflns_theta_full              26.00 
_diffrn_measured_fraction_theta_full   0.996 
_refine_diff_density_max    0.373 
_refine_diff_density_min   -0.619 
_refine_diff_density_rms    0.062 


data_str0579

_audit_creation_method            SHELXL-97
_chemical_name_systematic
;
 ?
;
_chemical_name_common             ?
_chemical_melting_point           ?
_chemical_formula_moiety          ?
_chemical_formula_sum
 'C31 H26 O4 P2 Ru2 S2'
_chemical_formula_weight          790.72

loop_
 _atom_type_symbol
 _atom_type_description
 _atom_type_scat_dispersion_real
 _atom_type_scat_dispersion_imag
 _atom_type_scat_source
 'C'  'C'   0.0033   0.0016
 'International Tables Vol C Tables 4.2.6.8 and 6.1.1.4'
 'H'  'H'   0.0000   0.0000
 'International Tables Vol C Tables 4.2.6.8 and 6.1.1.4'
 'O'  'O'   0.0106   0.0060
 'International Tables Vol C Tables 4.2.6.8 and 6.1.1.4'
 'P'  'P'   0.1023   0.0942
 'International Tables Vol C Tables 4.2.6.8 and 6.1.1.4'
 'S'  'S'   0.1246   0.1234
 'International Tables Vol C Tables 4.2.6.8 and 6.1.1.4'
 'Ru'  'Ru'  -1.2594   0.8363
 'International Tables Vol C Tables 4.2.6.8 and 6.1.1.4'

_symmetry_cell_setting            monoclinic
_symmetry_space_group_name_H-M    Cc

loop_
 _symmetry_equiv_pos_as_xyz
 'x, y, z'
 'x, -y, z+1/2'
 'x+1/2, y+1/2, z'
 'x+1/2, -y+1/2, z+1/2'

_cell_length_a                    19.998(4)
_cell_length_b                    52.874(11)
_cell_length_c                    8.7981(19)
_cell_angle_alpha                 90.00
_cell_angle_beta                  96.520(3)
_cell_angle_gamma                 90.00
_cell_volume                      9243(3)
_cell_formula_units_Z             12
_cell_measurement_temperature     123(2)
_cell_measurement_reflns_used     ?
_cell_measurement_theta_min       ?
_cell_measurement_theta_max       ?

_exptl_crystal_description        block
_exptl_crystal_colour             yellow
_exptl_crystal_size_max           0.45
_exptl_crystal_size_mid           0.40
_exptl_crystal_size_min           0.36
_exptl_crystal_density_meas       ?
_exptl_crystal_density_diffrn     1.705
_exptl_crystal_density_method     'not measured'
_exptl_crystal_F_000              4728
_exptl_absorpt_coefficient_mu     1.255
_exptl_absorpt_correction_type    multi-scan
_exptl_absorpt_correction_T_min   0.6020
_exptl_absorpt_correction_T_max   0.6608
_exptl_absorpt_process_details    ?

_exptl_special_details
;
 ?
;

_diffrn_ambient_temperature       123(2)
_diffrn_radiation_wavelength      0.71073
_diffrn_radiation_type            MoK\a
_diffrn_radiation_source          'fine-focus sealed tube'
_diffrn_radiation_monochromator   graphite
_diffrn_measurement_device_type   'Bruker SMART APEX diffractometer'
_diffrn_measurement_method        '\w rotation with narrow frames'
_diffrn_detector_area_resol_mean  ?
_diffrn_standards_number          ?
_diffrn_standards_interval_count  ?
_diffrn_standards_interval_time   ?
_diffrn_standards_decay_%         ?
_diffrn_reflns_number             40263
_diffrn_reflns_av_R_equivalents   0.0421
_diffrn_reflns_av_sigmaI/netI     0.0611
_diffrn_reflns_limit_h_min        -26
_diffrn_reflns_limit_h_max        26
_diffrn_reflns_limit_k_min        -68
_diffrn_reflns_limit_k_max        68
_diffrn_reflns_limit_l_min        -11
_diffrn_reflns_limit_l_max        11
_diffrn_reflns_theta_min          2.89
_diffrn_reflns_theta_max          28.34
_reflns_number_total              20988
_reflns_number_gt                 19648
_reflns_threshold_expression      I>2\s(I)

_computing_data_collection        'Bruker SMART'
_computing_cell_refinement        'Bruker SAINT'
_computing_data_reduction         'Bruker SAINT'
_computing_structure_solution     'SHELXS-97 (Sheldrick, 1990)'
_computing_structure_refinement   'SHELXL-97 (Sheldrick, 1997)'
_computing_molecular_graphics     ?
_computing_publication_material   ?

_refine_special_details
;
 Refinement of F^2^ against ALL reflections.  The weighted R-factor wR and
 goodness of fit S are based on F^2^, conventional R-factors R are based
 on F, with F set to zero for negative F^2^. The threshold expression of
 F^2^ > 2sigma(F^2^) is used only for calculating R-factors(gt) etc. and is
 not relevant to the choice of reflections for refinement.  R-factors based
 on F^2^ are statistically about twice as large as those based on F, and R-
 factors based on ALL data will be even larger.
;

_refine_ls_structure_factor_coef  Fsqd
_refine_ls_matrix_type            full
_refine_ls_weighting_scheme       calc
_refine_ls_weighting_details
 'calc w=1/[\s^2^(Fo^2^)+(0.0351P)^2^+0.4616P] where P=(Fo^2^+2Fc^2^)/3'
_atom_sites_solution_primary      direct
_atom_sites_solution_secondary    difmap
_atom_sites_solution_hydrogens    geom
_refine_ls_hydrogen_treatment     constr
_refine_ls_extinction_method      none
_refine_ls_extinction_coef        ?
_refine_ls_abs_structure_details
 'Flack H D (1983), Acta Cryst. A39, 876-881'
_refine_ls_abs_structure_Flack    0.00
_refine_ls_number_reflns          20988
_refine_ls_number_parameters      1108
_refine_ls_number_restraints      2
_refine_ls_R_factor_all           0.0414
_refine_ls_R_factor_gt            0.0384
_refine_ls_wR_factor_ref          0.0884
_refine_ls_wR_factor_gt           0.0869
_refine_ls_goodness_of_fit_ref    1.067
_refine_ls_restrained_S_all       1.067
_refine_ls_shift/su_max           0.001
_refine_ls_shift/su_mean          0.000

loop_
 _atom_site_label
 _atom_site_type_symbol
 _atom_site_fract_x
 _atom_site_fract_y
 _atom_site_fract_z
 _atom_site_U_iso_or_equiv
 _atom_site_adp_type
 _atom_site_occupancy
 _atom_site_symmetry_multiplicity
 _atom_site_calc_flag
 _atom_site_refinement_flags
 _atom_site_disorder_assembly
 _atom_site_disorder_group
Ru1 Ru 0.859924(17) 0.064001(7) 0.64066(4) 0.01757(8) Uani 1 1 d . . .
Ru2 Ru 0.993214(17) 0.071035(7) 0.69943(4) 0.01624(8) Uani 1 1 d . . .
Ru3 Ru 0.356488(17) 0.103474(7) 0.17751(4) 0.01667(8) Uani 1 1 d . . .
Ru4 Ru 0.489788(17) 0.097580(7) 0.23269(4) 0.01740(8) Uani 1 1 d . . .
Ru5 Ru 0.303046(19) 0.231127(7) 0.25889(4) 0.01715(8) Uani 1 1 d . . .
Ru6 Ru 0.169674(18) 0.237674(7) 0.19831(4) 0.01745(8) Uani 1 1 d . . .
S1 S 0.93607(6) 0.06342(2) 0.45138(13) 0.0219(2) Uani 1 1 d . . .
S2 S 0.93714(6) 0.03153(2) 0.72999(14) 0.0196(2) Uani 1 1 d . . .
S3 S 0.43136(6) 0.10507(2) -0.01394(13) 0.0215(2) Uani 1 1 d . . .
S4 S 0.43210(6) 0.13682(2) 0.26600(13) 0.0195(2) Uani 1 1 d . . .
S5 S 0.22623(7) 0.22983(2) 0.44636(14) 0.0215(3) Uani 1 1 d . . .
S6 S 0.22691(6) 0.19824(2) 0.16581(14) 0.0204(3) Uani 1 1 d . . .
P1 P 0.84452(6) 0.07325(2) 0.89160(13) 0.0169(2) Uani 1 1 d . . .
P2 P 0.99805(6) 0.07504(2) 0.96317(13) 0.0158(2) Uani 1 1 d . . .
P3 P 0.34041(6) 0.09492(2) 0.42936(13) 0.0163(2) Uani 1 1 d . . .
P4 P 0.49418(6) 0.09323(2) 0.49590(13) 0.0163(2) Uani 1 1 d . . .
P5 P 0.32067(6) 0.24006(2) 0.00868(15) 0.0173(2) Uani 1 1 d . . .
P6 P 0.16727(6) 0.24256(2) -0.06415(14) 0.0162(2) Uani 1 1 d . . .
O1 O 0.7379(2) 0.03066(9) 0.5561(6) 0.0610(14) Uani 1 1 d . . .
O2 O 0.7957(2) 0.11171(8) 0.5010(5) 0.0523(12) Uani 1 1 d . . .
O3 O 1.1429(2) 0.06086(9) 0.6992(5) 0.0496(12) Uani 1 1 d . . .
O4 O 0.99510(19) 0.12702(6) 0.6298(4) 0.0313(8) Uani 1 1 d . . .
O5 O 0.2335(2) 0.13512(8) 0.0721(5) 0.0453(11) Uani 1 1 d . . .
O6 O 0.2946(2) 0.05517(8) 0.0431(5) 0.0502(12) Uani 1 1 d . . .
O7 O 0.4877(2) 0.04204(7) 0.1556(4) 0.0391(9) Uani 1 1 d . . .
O8 O 0.6409(2) 0.10540(10) 0.2288(5) 0.0499(12) Uani 1 1 d . . .
O9 O 0.4277(2) 0.20022(8) 0.3618(5) 0.0424(11) Uani 1 1 d . . .
O10 O 0.3628(2) 0.27942(8) 0.4012(5) 0.0447(11) Uani 1 1 d . . .
O11 O 0.0192(2) 0.22874(10) 0.1885(5) 0.0487(12) Uani 1 1 d . . .
O12 O 0.1680(2) 0.29326(7) 0.2742(5) 0.0358(9) Uani 1 1 d . . .
C1 C 0.7831(3) 0.04365(10) 0.5851(6) 0.0307(12) Uani 1 1 d . . .
C2 C 0.8196(3) 0.09415(10) 0.5573(6) 0.0298(11) Uani 1 1 d . . .
C3 C 1.0866(3) 0.06421(10) 0.6967(6) 0.0275(11) Uani 1 1 d . . .
C4 C 0.9960(2) 0.10582(10) 0.6590(6) 0.0239(10) Uani 1 1 d . . .
C5 C 0.9541(3) 0.03006(9) 0.4189(6) 0.0280(11) Uani 1 1 d . . .
H5A H 0.9240 0.0240 0.3292 0.034 Uiso 1 1 calc R . .
H5B H 1.0010 0.0285 0.3945 0.034 Uiso 1 1 calc R . .
C6 C 0.9449(3) 0.01334(9) 0.5558(5) 0.0271(11) Uani 1 1 d . . .
H6A H 0.9838 0.0018 0.5744 0.033 Uiso 1 1 calc R . .
H6B H 0.9040 0.0029 0.5317 0.033 Uiso 1 1 calc R . .
C7 C 0.9188(2) 0.06376(8) 1.0240(5) 0.0167(9) Uani 1 1 d . . .
H7A H 0.9141 0.0705 1.1271 0.020 Uiso 1 1 calc R . .
H7B H 0.9202 0.0451 1.0313 0.020 Uiso 1 1 calc R . .
C8 C 0.2796(2) 0.12296(9) 0.1123(6) 0.0255(10) Uani 1 1 d . . .
C9 C 0.3176(3) 0.07313(10) 0.0973(6) 0.0274(11) Uani 1 1 d . . .
C10 C 0.4908(3) 0.06287(9) 0.1901(6) 0.0260(11) Uani 1 1 d . . .
C11 C 0.5840(3) 0.10336(10) 0.2291(6) 0.0296(12) Uani 1 1 d . . .
C12 C 0.4465(3) 0.13853(9) -0.0460(6) 0.0269(11) Uani 1 1 d . . .
H12A H 0.4931 0.1407 -0.0718 0.032 Uiso 1 1 calc R . .
H12B H 0.4155 0.1443 -0.1350 0.032 Uiso 1 1 calc R . .
C13 C 0.4368(3) 0.15511(9) 0.0911(5) 0.0249(10) Uani 1 1 d . . .
H13A H 0.3948 0.1650 0.0684 0.030 Uiso 1 1 calc R . .
H13B H 0.4747 0.1672 0.1080 0.030 Uiso 1 1 calc R . .
C14 C 0.4150(2) 0.10458(8) 0.5614(5) 0.0197(9) Uani 1 1 d . . .
H14A H 0.4163 0.1233 0.5691 0.024 Uiso 1 1 calc R . .
H14B H 0.4110 0.0977 0.6646 0.024 Uiso 1 1 calc R . .
C15 C 0.3808(3) 0.21177(10) 0.3232(6) 0.0262(11) Uani 1 1 d . . .
C16 C 0.3406(3) 0.26154(9) 0.3426(6) 0.0270(12) Uani 1 1 d . . .
C17 C 0.0758(3) 0.23130(10) 0.1946(6) 0.0276(12) Uani 1 1 d . . .
C18 C 0.1664(3) 0.27230(10) 0.2426(6) 0.0215(11) Uani 1 1 d . . .
C19 C 0.2115(3) 0.19623(9) 0.4762(6) 0.0272(12) Uani 1 1 d . . .
H19A H 0.2430 0.1903 0.5639 0.033 Uiso 1 1 calc R . .
H19B H 0.1651 0.1940 0.5034 0.033 Uiso 1 1 calc R . .
C20 C 0.2202(3) 0.17996(10) 0.3391(6) 0.0284(12) Uani 1 1 d . . .
H20A H 0.1813 0.1683 0.3208 0.034 Uiso 1 1 calc R . .
H20B H 0.2612 0.1695 0.3617 0.034 Uiso 1 1 calc R . .
C21 C 0.2470(2) 0.23155(8) -0.1270(5) 0.0156(9) Uani 1 1 d . . .
H21A H 0.2522 0.2390 -0.2282 0.019 Uiso 1 1 calc R . .
H21B H 0.2453 0.2129 -0.1391 0.019 Uiso 1 1 calc R . .
C22 C 0.8309(2) 0.10647(9) 0.9401(6) 0.0176(10) Uani 1 1 d . . .
C23 C 0.8589(2) 0.12573(9) 0.8592(5) 0.0229(10) Uani 1 1 d . . .
H23A H 0.8835 0.1215 0.7766 0.027 Uiso 1 1 calc R . .
C24 C 0.8515(3) 0.15086(10) 0.8970(6) 0.0259(11) Uani 1 1 d . . .
H24A H 0.8718 0.1637 0.8424 0.031 Uiso 1 1 calc R . .
C25 C 0.8145(3) 0.15710(10) 1.0148(6) 0.0282(11) Uani 1 1 d . . .
H25A H 0.8084 0.1743 1.0404 0.034 Uiso 1 1 calc R . .
C26 C 0.7862(2) 0.13803(10) 1.0961(6) 0.0284(11) Uani 1 1 d . . .
H26A H 0.7605 0.1425 1.1766 0.034 Uiso 1 1 calc R . .
C27 C 0.7947(2) 0.11283(9) 1.0619(5) 0.0231(10) Uani 1 1 d . . .
H27A H 0.7762 0.1000 1.1202 0.028 Uiso 1 1 calc R . .
C28 C 0.7753(2) 0.05756(8) 0.9726(5) 0.0209(10) Uani 1 1 d . . .
C29 C 0.7110(3) 0.06154(10) 0.8989(7) 0.0318(12) Uani 1 1 d . . .
H29A H 0.7051 0.0713 0.8078 0.038 Uiso 1 1 calc R . .
C30 C 0.6559(3) 0.05142(11) 0.9567(7) 0.0386(14) Uani 1 1 d . . .
H30A H 0.6121 0.0541 0.9049 0.046 Uiso 1 1 calc R . .
C31 C 0.6640(3) 0.03747(11) 1.0895(8) 0.0450(16) Uani 1 1 d . . .
H31A H 0.6256 0.0308 1.1301 0.054 Uiso 1 1 calc R . .
C32 C 0.7260(4) 0.03311(12) 1.1627(8) 0.0464(17) Uani 1 1 d . . .
H32A H 0.7311 0.0232 1.2534 0.056 Uiso 1 1 calc R . .
C33 C 0.7832(3) 0.04321(11) 1.1046(6) 0.0347(13) Uani 1 1 d . . .
H33A H 0.8269 0.0402 1.1558 0.042 Uiso 1 1 calc R . .
C34 C 1.0131(2) 0.10601(8) 1.0502(5) 0.0192(9) Uani 1 1 d . . .
C35 C 1.0662(2) 0.12037(9) 1.0069(6) 0.0250(10) Uani 1 1 d . . .
H35A H 1.0924 0.1141 0.9316 0.030 Uiso 1 1 calc R . .
C36 C 1.0810(2) 0.14360(9) 1.0722(6) 0.0258(11) Uani 1 1 d . . .
H36A H 1.1171 0.1533 1.0412 0.031 Uiso 1 1 calc R . .
C37 C 1.0437(3) 0.15296(9) 1.1827(6) 0.0299(12) Uani 1 1 d . . .
H37A H 1.0537 0.1692 1.2261 0.036 Uiso 1 1 calc R . .
C38 C 0.9923(3) 0.13890(9) 1.2297(6) 0.0267(11) Uani 1 1 d . . .
H38A H 0.9671 0.1453 1.3064 0.032 Uiso 1 1 calc R . .
C39 C 0.9768(2) 0.11516(9) 1.1657(5) 0.0234(10) Uani 1 1 d . . .
H39A H 0.9418 0.1053 1.2002 0.028 Uiso 1 1 calc R . .
C40 C 1.0600(2) 0.05524(9) 1.0789(5) 0.0192(9) Uani 1 1 d . . .
C41 C 1.0865(2) 0.06187(9) 1.2255(6) 0.0230(10) Uani 1 1 d . . .
H41A H 1.0718 0.0770 1.2697 0.028 Uiso 1 1 calc R . .
C42 C 1.1344(3) 0.04677(10) 1.3094(6) 0.0291(11) Uani 1 1 d . . .
H42A H 1.1527 0.0517 1.4093 0.035 Uiso 1 1 calc R . .
C43 C 1.1552(3) 0.02466(11) 1.2471(6) 0.0340(13) Uani 1 1 d . . .
H43A H 1.1879 0.0143 1.3039 0.041 Uiso 1 1 calc R . .
C44 C 1.1284(3) 0.01755(10) 1.1017(6) 0.0312(12) Uani 1 1 d . . .
H44A H 1.1423 0.0021 1.0594 0.037 Uiso 1 1 calc R . .
C45 C 1.0817(2) 0.03263(9) 1.0175(6) 0.0260(10) Uani 1 1 d . . .
H45A H 1.0641 0.0277 0.9171 0.031 Uiso 1 1 calc R . .
C46 C 0.3261(2) 0.06242(10) 0.4879(5) 0.0188(10) Uani 1 1 d . . .
C47 C 0.2929(2) 0.05698(8) 0.6143(5) 0.0229(10) Uani 1 1 d . . .
H47A H 0.2752 0.0704 0.6693 0.027 Uiso 1 1 calc R . .
C48 C 0.2854(3) 0.03220(9) 0.6611(6) 0.0290(11) Uani 1 1 d . . .
H48A H 0.2625 0.0288 0.7477 0.035 Uiso 1 1 calc R . .
C49 C 0.3110(3) 0.01240(9) 0.5828(6) 0.0275(11) Uani 1 1 d . . .
H49A H 0.3053 -0.0045 0.6150 0.033 Uiso 1 1 calc R . .
C50 C 0.3446(3) 0.01736(9) 0.4580(6) 0.0275(11) Uani 1 1 d . . .
H50A H 0.3627 0.0038 0.4049 0.033 Uiso 1 1 calc R . .
C51 C 0.3525(2) 0.04210(10) 0.4089(6) 0.0253(10) Uani 1 1 d . . .
H51A H 0.3756 0.0453 0.3222 0.030 Uiso 1 1 calc R . .
C52 C 0.2714(2) 0.11153(8) 0.5066(5) 0.0184(9) Uani 1 1 d . . .
C53 C 0.2804(3) 0.12653(9) 0.6386(6) 0.0266(11) Uani 1 1 d . . .
H53A H 0.3239 0.1284 0.6934 0.032 Uiso 1 1 calc R . .
C54 C 0.2251(3) 0.13876(10) 0.6892(7) 0.0308(13) Uani 1 1 d . . .
H54A H 0.2314 0.1494 0.7767 0.037 Uiso 1 1 calc R . .
C55 C 0.1623(3) 0.13553(10) 0.6139(7) 0.0337(13) Uani 1 1 d . . .
H55A H 0.1247 0.1435 0.6508 0.040 Uiso 1 1 calc R . .
C56 C 0.1529(2) 0.12048(10) 0.4826(6) 0.0289(11) Uani 1 1 d . . .
H56A H 0.1092 0.1182 0.4297 0.035 Uiso 1 1 calc R . .
C57 C 0.2074(2) 0.10911(9) 0.4312(6) 0.0234(10) Uani 1 1 d . . .
H57A H 0.2011 0.0992 0.3406 0.028 Uiso 1 1 calc R . .
C58 C 0.5558(2) 0.11303(9) 0.6130(5) 0.0195(9) Uani 1 1 d . . .
C59 C 0.5831(3) 0.13394(10) 0.5495(6) 0.0358(13) Uani 1 1 d . . .
H59A H 0.5690 0.1382 0.4459 0.043 Uiso 1 1 calc R . .
C60 C 0.6305(3) 0.14887(11) 0.6334(7) 0.0419(15) Uani 1 1 d . . .
H60A H 0.6487 0.1633 0.5880 0.050 Uiso 1 1 calc R . .
C61 C 0.6510(3) 0.14274(10) 0.7821(6) 0.0309(12) Uani 1 1 d . . .
H61A H 0.6834 0.1530 0.8405 0.037 Uiso 1 1 calc R . .
C62 C 0.6255(3) 0.12214(11) 0.8475(6) 0.0340(13) Uani 1 1 d . . .
H62A H 0.6406 0.1179 0.9507 0.041 Uiso 1 1 calc R . .
C63 C 0.5776(3) 0.10736(10) 0.7636(6) 0.0294(11) Uani 1 1 d . . .
H63A H 0.5595 0.0931 0.8103 0.035 Uiso 1 1 calc R . .
C64 C 0.5095(2) 0.06200(9) 0.5806(5) 0.0196(9) Uani 1 1 d . . .
C65 C 0.4751(2) 0.05263(9) 0.7001(5) 0.0205(9) Uani 1 1 d . . .
H65A H 0.4408 0.0625 0.7377 0.025 Uiso 1 1 calc R . .
C66 C 0.4915(2) 0.02906(9) 0.7627(6) 0.0252(10) Uani 1 1 d . . .
H66A H 0.4681 0.0226 0.8425 0.030 Uiso 1 1 calc R . .
C67 C 0.5422(3) 0.01492(9) 0.7086(6) 0.0284(11) Uani 1 1 d . . .
H67A H 0.5539 -0.0011 0.7522 0.034 Uiso 1 1 calc R . .
C68 C 0.5759(3) 0.02419(10) 0.5904(6) 0.0317(12) Uani 1 1 d . . .
H68A H 0.6099 0.0143 0.5523 0.038 Uiso 1 1 calc R . .
C69 C 0.5604(3) 0.04739(9) 0.5290(6) 0.0241(10) Uani 1 1 d . . .
H69A H 0.5846 0.0537 0.4502 0.029 Uiso 1 1 calc R . .
C70 C 0.3890(2) 0.22339(10) -0.0722(6) 0.0236(11) Uani 1 1 d . . .
C71 C 0.4537(3) 0.22572(10) 0.0049(6) 0.0248(11) Uani 1 1 d . . .
H71A H 0.4609 0.2354 0.0964 0.030 Uiso 1 1 calc R . .
C72 C 0.5076(3) 0.21397(10) -0.0523(7) 0.0310(12) Uani 1 1 d . . .
H72A H 0.5516 0.2160 -0.0005 0.037 Uiso 1 1 calc R . .
C73 C 0.4984(3) 0.19944(11) -0.1824(7) 0.0352(14) Uani 1 1 d . . .
H73A H 0.5356 0.1913 -0.2202 0.042 Uiso 1 1 calc R . .
C74 C 0.4333(3) 0.19679(11) -0.2585(7) 0.0337(13) Uani 1 1 d . . .
H74A H 0.4257 0.1866 -0.3480 0.040 Uiso 1 1 calc R . .
C75 C 0.3805(3) 0.20908(10) -0.2022(6) 0.0297(12) Uani 1 1 d . . .
H75A H 0.3367 0.2075 -0.2557 0.036 Uiso 1 1 calc R . .
C76 C 0.3361(2) 0.27312(10) -0.0380(6) 0.0205(10) Uani 1 1 d . . .
C77 C 0.3739(2) 0.27957(10) -0.1562(6) 0.0242(11) Uani 1 1 d . . .
H77A H 0.3933 0.2666 -0.2119 0.029 Uiso 1 1 calc R . .
C78 C 0.3833(2) 0.30468(10) -0.1928(6) 0.0260(11) Uani 1 1 d . . .
H78A H 0.4095 0.3091 -0.2723 0.031 Uiso 1 1 calc R . .
C79 C 0.3536(3) 0.32350(10) -0.1114(6) 0.0292(12) Uani 1 1 d . . .
H79A H 0.3600 0.3408 -0.1360 0.035 Uiso 1 1 calc R . .
C80 C 0.3157(3) 0.31747(10) 0.0027(6) 0.0242(11) Uani 1 1 d . . .
H80A H 0.2955 0.3304 0.0567 0.029 Uiso 1 1 calc R . .
C81 C 0.3069(3) 0.29223(9) 0.0393(6) 0.0232(10) Uani 1 1 d . . .
H81A H 0.2803 0.2880 0.1185 0.028 Uiso 1 1 calc R . .
C82 C 0.1522(2) 0.27390(9) -0.1491(5) 0.0170(9) Uani 1 1 d . . .
C83 C 0.1887(2) 0.28388(9) -0.2599(6) 0.0223(10) Uani 1 1 d . . .
H83A H 0.2252 0.2746 -0.2924 0.027 Uiso 1 1 calc R . .
C84 C 0.1720(3) 0.30741(10) -0.3234(6) 0.0275(11) Uani 1 1 d . . .
H84A H 0.1972 0.3141 -0.3996 0.033 Uiso 1 1 calc R . .
C85 C 0.1192(3) 0.32132(9) -0.2770(6) 0.0288(12) Uani 1 1 d . . .
H85A H 0.1093 0.3377 -0.3179 0.035 Uiso 1 1 calc R . .
C86 C 0.0814(3) 0.31110(9) -0.1707(6) 0.0257(11) Uani 1 1 d . . .
H86A H 0.0438 0.3202 -0.1420 0.031 Uiso 1 1 calc R . .
C87 C 0.0977(3) 0.28746(9) -0.1044(6) 0.0230(11) Uani 1 1 d . . .
H87A H 0.0720 0.2807 -0.0296 0.028 Uiso 1 1 calc R . .
C88 C 0.1061(2) 0.22319(9) -0.1844(6) 0.0208(10) Uani 1 1 d . . .
C89 C 0.0826(3) 0.23006(10) -0.3332(6) 0.0238(11) Uani 1 1 d . . .
H89A H 0.0984 0.2452 -0.3757 0.029 Uiso 1 1 calc R . .
C90 C 0.0360(3) 0.21481(11) -0.4204(6) 0.0307(12) Uani 1 1 d . . .
H90A H 0.0210 0.2195 -0.5227 0.037 Uiso 1 1 calc R . .
C91 C 0.0117(3) 0.19343(11) -0.3625(6) 0.0334(13) Uani 1 1 d . . .
H91A H -0.0201 0.1833 -0.4236 0.040 Uiso 1 1 calc R . .
C92 C 0.0336(3) 0.18639(11) -0.2127(7) 0.0426(16) Uani 1 1 d . . .
H92A H 0.0164 0.1715 -0.1701 0.051 Uiso 1 1 calc R . .
C93 C 0.0807(3) 0.20128(10) -0.1262(6) 0.0333(13) Uani 1 1 d . . .
H93A H 0.0960 0.1963 -0.0243 0.040 Uiso 1 1 calc R . .

loop_
 _atom_site_aniso_label
 _atom_site_aniso_U_11
 _atom_site_aniso_U_22
 _atom_site_aniso_U_33
 _atom_site_aniso_U_23
 _atom_site_aniso_U_13
 _atom_site_aniso_U_12
Ru1 0.01849(18) 0.01776(18) 0.01615(18) -0.00172(13) 0.00053(14) -0.00033(14)
Ru2 0.01762(18) 0.01609(16) 0.01555(18) -0.00041(13) 0.00424(14) -0.00044(14)
Ru3 0.01939(18) 0.01540(17) 0.01460(18) -0.00041(13) -0.00071(14) -0.00109(14)
Ru4 0.01973(18) 0.01762(17) 0.01488(18) 0.00066(13) 0.00209(14) 0.00044(14)
Ru5 0.01907(19) 0.01684(18) 0.01524(18) 0.00087(14) 0.00064(14) -0.00104(14)
Ru6 0.01838(19) 0.01824(18) 0.01591(19) 0.00220(14) 0.00272(15) -0.00030(15)
S1 0.0290(6) 0.0205(6) 0.0167(6) -0.0011(4) 0.0044(5) -0.0006(5)
S2 0.0247(6) 0.0162(5) 0.0181(6) 0.0010(4) 0.0037(5) 0.0004(4)
S3 0.0286(6) 0.0208(6) 0.0149(5) 0.0007(4) 0.0019(5) -0.0022(5)
S4 0.0253(6) 0.0155(5) 0.0167(6) -0.0003(4) -0.0012(5) -0.0019(4)
S5 0.0267(7) 0.0227(6) 0.0151(6) 0.0009(4) 0.0027(5) -0.0008(5)
S6 0.0257(7) 0.0172(6) 0.0176(6) 0.0007(4) -0.0001(5) -0.0024(5)
P1 0.0154(6) 0.0175(6) 0.0178(6) -0.0006(4) 0.0025(5) -0.0002(4)
P2 0.0131(5) 0.0163(5) 0.0179(6) -0.0006(4) 0.0015(4) -0.0001(4)
P3 0.0164(6) 0.0157(6) 0.0166(6) 0.0003(4) 0.0012(5) -0.0008(4)
P4 0.0164(6) 0.0156(5) 0.0165(6) -0.0003(4) 0.0003(4) 0.0007(4)
P5 0.0160(6) 0.0171(6) 0.0187(6) 0.0005(4) 0.0012(5) -0.0002(5)
P6 0.0151(6) 0.0167(6) 0.0167(6) 0.0014(4) 0.0013(5) -0.0014(5)
O1 0.050(3) 0.070(3) 0.064(3) -0.026(3) 0.009(2) -0.031(3)
O2 0.068(3) 0.044(3) 0.042(3) 0.006(2) -0.008(2) 0.026(2)
O3 0.025(2) 0.074(3) 0.053(3) 0.008(2) 0.017(2) 0.009(2)
O4 0.039(2) 0.0226(19) 0.033(2) 0.0048(15) 0.0108(17) -0.0023(16)
O5 0.040(3) 0.045(2) 0.049(3) 0.007(2) -0.003(2) 0.016(2)
O6 0.075(3) 0.033(2) 0.039(2) -0.0038(19) -0.009(2) -0.021(2)
O7 0.053(3) 0.026(2) 0.038(2) -0.0071(16) 0.0028(19) 0.0069(18)
O8 0.023(2) 0.077(3) 0.051(3) 0.007(2) 0.011(2) -0.006(2)
O9 0.034(2) 0.049(3) 0.043(3) 0.004(2) -0.001(2) 0.020(2)
O10 0.062(3) 0.033(2) 0.035(2) -0.0069(18) -0.007(2) -0.015(2)
O11 0.027(3) 0.082(4) 0.038(3) 0.008(2) 0.008(2) -0.011(2)
O12 0.048(3) 0.0189(19) 0.041(2) -0.0025(16) 0.0042(19) 0.0063(17)
C1 0.025(3) 0.038(3) 0.029(3) -0.008(2) 0.001(2) -0.007(2)
C2 0.031(3) 0.033(3) 0.025(3) 0.000(2) 0.000(2) 0.006(2)
C3 0.027(3) 0.033(3) 0.023(3) -0.001(2) 0.009(2) 0.003(2)
C4 0.023(3) 0.026(3) 0.023(3) 0.0011(19) 0.003(2) -0.003(2)
C5 0.037(3) 0.027(3) 0.021(3) -0.009(2) 0.008(2) 0.001(2)
C6 0.044(3) 0.018(2) 0.021(2) -0.0070(18) 0.007(2) 0.001(2)
C7 0.018(2) 0.019(2) 0.014(2) -0.0029(16) 0.0038(17) -0.0019(17)
C8 0.024(2) 0.029(3) 0.022(2) 0.005(2) -0.003(2) 0.006(2)
C9 0.032(3) 0.032(3) 0.017(2) 0.001(2) 0.000(2) -0.006(2)
C10 0.034(3) 0.028(3) 0.016(2) -0.002(2) 0.002(2) 0.007(2)
C11 0.037(3) 0.033(3) 0.019(3) 0.004(2) 0.001(2) 0.001(2)
C12 0.035(3) 0.022(2) 0.023(3) 0.0055(19) 0.000(2) -0.005(2)
C13 0.033(3) 0.020(2) 0.022(3) 0.0100(18) 0.001(2) -0.004(2)
C14 0.022(2) 0.015(2) 0.022(2) -0.0019(17) 0.0003(19) -0.0028(18)
C15 0.033(3) 0.028(3) 0.018(2) 0.001(2) 0.002(2) -0.004(2)
C16 0.033(3) 0.021(3) 0.027(3) 0.002(2) 0.004(2) -0.004(2)
C17 0.027(3) 0.036(3) 0.022(3) 0.001(2) 0.010(2) 0.000(2)
C18 0.023(3) 0.027(3) 0.015(2) 0.0032(19) 0.004(2) 0.004(2)
C19 0.035(3) 0.026(3) 0.020(3) 0.004(2) -0.002(2) -0.006(2)
C20 0.036(3) 0.022(3) 0.026(3) 0.004(2) 0.001(2) -0.006(2)
C21 0.014(2) 0.014(2) 0.019(2) 0.0001(16) 0.0002(18) -0.0002(16)
C22 0.008(2) 0.019(2) 0.026(3) -0.0011(18) -0.0003(18) 0.0017(16)
C23 0.022(2) 0.030(3) 0.017(2) 0.0003(19) 0.0020(18) -0.001(2)
C24 0.024(3) 0.024(3) 0.029(3) 0.005(2) 0.001(2) 0.001(2)
C25 0.030(3) 0.021(3) 0.032(3) -0.006(2) -0.003(2) 0.003(2)
C26 0.021(2) 0.036(3) 0.029(3) -0.013(2) 0.003(2) 0.006(2)
C27 0.025(2) 0.024(2) 0.021(2) -0.0070(19) 0.0028(19) -0.0033(19)
C28 0.019(2) 0.019(2) 0.025(3) -0.0084(18) 0.0044(19) -0.0036(18)
C29 0.026(3) 0.031(3) 0.038(3) -0.003(2) 0.001(2) -0.009(2)
C30 0.021(3) 0.037(3) 0.059(4) -0.016(3) 0.008(3) -0.001(2)
C31 0.040(3) 0.037(3) 0.064(4) -0.012(3) 0.030(3) -0.022(3)
C32 0.052(4) 0.043(4) 0.049(4) 0.012(3) 0.025(3) -0.009(3)
C33 0.027(3) 0.043(3) 0.035(3) 0.006(2) 0.005(2) -0.007(2)
C34 0.020(2) 0.018(2) 0.019(2) -0.0029(17) -0.0018(18) 0.0005(18)
C35 0.022(2) 0.023(2) 0.029(3) 0.002(2) -0.001(2) 0.0019(19)
C36 0.020(2) 0.023(2) 0.033(3) 0.004(2) -0.002(2) -0.0004(19)
C37 0.032(3) 0.017(2) 0.038(3) -0.007(2) -0.010(2) 0.000(2)
C38 0.029(3) 0.021(2) 0.027(3) -0.009(2) -0.007(2) 0.008(2)
C39 0.026(3) 0.020(2) 0.023(2) -0.0029(18) -0.0001(19) 0.0021(19)
C40 0.010(2) 0.028(2) 0.019(2) -0.0027(18) 0.0019(17) -0.0054(17)
C41 0.024(2) 0.023(2) 0.022(2) -0.0021(18) 0.0029(19) 0.0037(19)
C42 0.031(3) 0.039(3) 0.017(2) 0.002(2) -0.003(2) 0.007(2)
C43 0.024(3) 0.046(3) 0.032(3) 0.009(2) 0.002(2) 0.008(2)
C44 0.034(3) 0.028(3) 0.031(3) -0.001(2) 0.004(2) 0.015(2)
C45 0.027(3) 0.028(3) 0.022(2) -0.0061(19) 0.000(2) 0.005(2)
C46 0.018(2) 0.020(2) 0.017(2) 0.0006(16) -0.0024(18) -0.0002(17)
C47 0.025(2) 0.019(2) 0.025(2) -0.0001(18) 0.0052(19) 0.0051(18)
C48 0.033(3) 0.027(2) 0.028(3) 0.009(2) 0.008(2) -0.001(2)
C49 0.031(3) 0.019(2) 0.031(3) 0.008(2) -0.007(2) -0.0036(19)
C50 0.034(3) 0.017(2) 0.029(3) -0.0052(19) -0.008(2) 0.004(2)
C51 0.023(2) 0.031(3) 0.021(2) 0.001(2) -0.0011(19) 0.001(2)
C52 0.022(2) 0.014(2) 0.019(2) 0.0042(16) 0.0018(18) 0.0023(17)
C53 0.026(3) 0.031(3) 0.024(3) -0.002(2) 0.005(2) 0.007(2)
C54 0.041(3) 0.022(3) 0.030(3) -0.001(2) 0.012(3) 0.004(2)
C55 0.030(3) 0.031(3) 0.044(3) 0.008(2) 0.022(3) 0.006(2)
C56 0.018(2) 0.030(3) 0.040(3) 0.011(2) 0.005(2) -0.002(2)
C57 0.022(2) 0.019(2) 0.028(3) 0.0023(19) 0.002(2) -0.0018(19)
C58 0.015(2) 0.022(2) 0.021(2) -0.0009(18) -0.0032(18) 0.0007(17)
C59 0.046(3) 0.031(3) 0.027(3) 0.009(2) -0.010(2) -0.010(2)
C60 0.049(4) 0.034(3) 0.038(3) 0.011(3) -0.014(3) -0.020(3)
C61 0.032(3) 0.029(3) 0.031(3) -0.003(2) -0.004(2) -0.006(2)
C62 0.029(3) 0.047(3) 0.024(3) -0.001(2) -0.007(2) -0.009(2)
C63 0.034(3) 0.028(3) 0.028(3) 0.002(2) 0.009(2) -0.006(2)
C64 0.016(2) 0.021(2) 0.020(2) -0.0003(18) -0.0033(18) -0.0025(18)
C65 0.020(2) 0.021(2) 0.019(2) 0.0003(17) -0.0032(18) -0.0026(17)
C66 0.024(2) 0.028(2) 0.021(2) 0.0068(19) -0.0049(19) -0.008(2)
C67 0.038(3) 0.016(2) 0.030(3) 0.004(2) -0.003(2) 0.001(2)
C68 0.038(3) 0.024(3) 0.032(3) -0.001(2) 0.001(2) 0.005(2)
C69 0.031(3) 0.021(2) 0.020(2) 0.0037(19) 0.002(2) 0.002(2)
C70 0.018(2) 0.026(3) 0.028(3) 0.007(2) 0.009(2) 0.003(2)
C71 0.020(3) 0.025(3) 0.028(3) 0.004(2) 0.000(2) 0.000(2)
C72 0.018(3) 0.032(3) 0.043(3) 0.010(2) 0.006(2) 0.010(2)
C73 0.030(3) 0.033(3) 0.045(4) 0.013(3) 0.015(3) 0.011(2)
C74 0.039(4) 0.039(3) 0.025(3) 0.000(2) 0.011(3) 0.008(3)
C75 0.031(3) 0.034(3) 0.024(3) -0.001(2) 0.004(2) 0.006(2)
C76 0.020(3) 0.021(3) 0.020(2) 0.0050(19) 0.0022(19) -0.0059(18)
C77 0.018(2) 0.030(3) 0.024(3) 0.003(2) 0.0025(19) 0.003(2)
C78 0.019(2) 0.032(3) 0.026(3) 0.015(2) 0.000(2) -0.002(2)
C79 0.024(3) 0.028(3) 0.034(3) 0.014(2) -0.004(2) -0.005(2)
C80 0.022(2) 0.021(2) 0.028(3) 0.0031(19) -0.004(2) -0.002(2)
C81 0.020(2) 0.024(3) 0.024(3) 0.0013(19) -0.0017(19) -0.007(2)
C82 0.020(2) 0.018(2) 0.012(2) 0.0020(17) -0.0023(18) 0.0003(18)
C83 0.016(2) 0.024(2) 0.026(3) 0.003(2) 0.0031(19) -0.0006(19)
C84 0.027(3) 0.029(3) 0.026(3) 0.010(2) 0.003(2) -0.010(2)
C85 0.036(3) 0.013(2) 0.034(3) 0.001(2) -0.007(2) -0.001(2)
C86 0.024(3) 0.015(2) 0.036(3) 0.001(2) -0.006(2) 0.0058(19)
C87 0.023(3) 0.020(2) 0.027(3) 0.000(2) 0.006(2) 0.003(2)
C88 0.018(2) 0.018(2) 0.025(3) -0.0014(19) 0.003(2) 0.0001(19)
C89 0.021(2) 0.029(3) 0.021(3) 0.0010(19) -0.003(2) -0.005(2)
C90 0.029(3) 0.034(3) 0.028(3) -0.003(2) -0.004(2) -0.003(2)
C91 0.031(3) 0.034(3) 0.031(3) -0.012(2) -0.015(2) -0.009(2)
C92 0.050(4) 0.033(3) 0.041(4) 0.010(3) -0.012(3) -0.017(3)
C93 0.041(3) 0.029(3) 0.026(3) 0.006(2) -0.014(2) -0.008(2)

_geom_special_details
;
 All esds (except the esd in the dihedral angle between two l.s. planes)
 are estimated using the full covariance matrix.  The cell esds are taken
 into account individually in the estimation of esds in distances, angles
 and torsion angles; correlations between esds in cell parameters are only
 used when they are defined by crystal symmetry.  An approximate (isotropic)
 treatment of cell esds is used for estimating esds involving l.s. planes.
;

loop_
 _geom_bond_atom_site_label_1
 _geom_bond_atom_site_label_2
 _geom_bond_distance
 _geom_bond_site_symmetry_2
 _geom_bond_publ_flag
Ru1 C1 1.893(5) . ?
Ru1 C2 1.896(5) . ?
Ru1 P1 2.3158(13) . ?
Ru1 S1 2.3809(12) . ?
Ru1 S2 2.3821(13) . ?
Ru1 Ru2 2.6829(7) . ?
Ru2 C4 1.875(5) . ?
Ru2 C3 1.904(5) . ?
Ru2 P2 2.3211(13) . ?
Ru2 S1 2.3800(13) . ?
Ru2 S2 2.4003(13) . ?
Ru3 C9 1.884(5) . ?
Ru3 C8 1.886(5) . ?
Ru3 P3 2.3193(13) . ?
Ru3 S3 2.3789(12) . ?
Ru3 S4 2.3945(13) . ?
Ru3 Ru4 2.6730(7) . ?
Ru4 C10 1.874(5) . ?
Ru4 C11 1.912(6) . ?
Ru4 P4 2.3189(13) . ?
Ru4 S3 2.3779(13) . ?
Ru4 S4 2.4078(13) . ?
Ru5 C16 1.889(5) . ?
Ru5 C15 1.894(6) . ?
Ru5 P5 2.3172(14) . ?
Ru5 S5 2.3791(13) . ?
Ru5 S6 2.3936(13) . ?
Ru5 Ru6 2.6823(8) . ?
Ru6 C18 1.875(5) . ?
Ru6 C17 1.903(6) . ?
Ru6 P6 2.3186(14) . ?
Ru6 S5 2.3777(14) . ?
Ru6 S6 2.4112(13) . ?
S1 C5 1.829(5) . ?
S2 C6 1.831(5) . ?
S3 C12 1.822(5) . ?
S4 C13 1.829(5) . ?
S5 C19 1.824(5) . ?
S6 C20 1.823(5) . ?
P1 C28 1.826(5) . ?
P1 C22 1.835(5) . ?
P1 C7 1.850(5) . ?
P2 C34 1.818(5) . ?
P2 C7 1.829(4) . ?
P2 C40 1.839(5) . ?
P3 C46 1.826(5) . ?
P3 C52 1.830(5) . ?
P3 C14 1.856(5) . ?
P4 C64 1.823(5) . ?
P4 C58 1.840(5) . ?
P4 C14 1.845(5) . ?
P5 C76 1.830(5) . ?
P5 C70 1.836(5) . ?
P5 C21 1.844(5) . ?
P6 C82 1.829(5) . ?
P6 C88 1.836(5) . ?
P6 C21 1.841(5) . ?
O1 C1 1.141(6) . ?
O2 C2 1.132(6) . ?
O3 C3 1.139(6) . ?
O4 C4 1.149(6) . ?
O5 C8 1.146(6) . ?
O6 C9 1.137(6) . ?
O7 C10 1.142(6) . ?
O8 C11 1.144(6) . ?
O9 C15 1.138(6) . ?
O10 C16 1.141(6) . ?
O11 C17 1.136(7) . ?
O12 C18 1.142(6) . ?
C5 C6 1.522(7) . ?
C12 C13 1.521(7) . ?
C19 C20 1.508(7) . ?
C22 C23 1.396(7) . ?
C22 C27 1.401(6) . ?
C23 C24 1.381(7) . ?
C24 C25 1.380(7) . ?
C25 C26 1.393(7) . ?
C26 C27 1.381(6) . ?
C28 C33 1.381(7) . ?
C28 C29 1.389(7) . ?
C29 C30 1.374(7) . ?
C30 C31 1.375(9) . ?
C31 C32 1.352(10) . ?
C32 C33 1.410(7) . ?
C34 C35 1.394(6) . ?
C34 C39 1.400(6) . ?
C35 C36 1.374(7) . ?
C36 C37 1.382(7) . ?
C37 C38 1.369(7) . ?
C38 C39 1.396(6) . ?
C40 C41 1.383(7) . ?
C40 C45 1.401(6) . ?
C41 C42 1.392(7) . ?
C42 C43 1.375(7) . ?
C43 C44 1.382(8) . ?
C44 C45 1.379(7) . ?
C46 C47 1.388(6) . ?
C46 C51 1.414(7) . ?
C47 C48 1.387(6) . ?
C48 C49 1.382(7) . ?
C49 C50 1.377(7) . ?
C50 C51 1.392(7) . ?
C52 C57 1.379(7) . ?
C52 C53 1.401(6) . ?
C53 C54 1.396(7) . ?
C54 C55 1.364(8) . ?
C55 C56 1.398(8) . ?
C56 C57 1.367(7) . ?
C58 C59 1.379(7) . ?
C58 C63 1.381(7) . ?
C59 C60 1.382(8) . ?
C60 C61 1.365(8) . ?
C61 C62 1.358(7) . ?
C62 C63 1.383(7) . ?
C64 C69 1.395(6) . ?
C64 C65 1.410(6) . ?
C65 C66 1.387(6) . ?
C66 C67 1.387(7) . ?
C67 C68 1.391(7) . ?
C68 C69 1.362(7) . ?
C70 C75 1.366(7) . ?
C70 C71 1.397(7) . ?
C71 C72 1.386(7) . ?
C72 C73 1.374(8) . ?
C73 C74 1.402(9) . ?
C74 C75 1.380(7) . ?
C76 C81 1.384(7) . ?
C76 C77 1.395(7) . ?
C77 C78 1.384(7) . ?
C78 C79 1.396(8) . ?
C79 C80 1.363(7) . ?
C80 C81 1.389(7) . ?
C82 C83 1.386(6) . ?
C82 C87 1.397(6) . ?
C83 C84 1.388(7) . ?
C84 C85 1.386(8) . ?
C85 C86 1.378(7) . ?
C86 C87 1.402(7) . ?
C88 C93 1.386(7) . ?
C88 C89 1.388(7) . ?
C89 C90 1.395(7) . ?
C90 C91 1.353(8) . ?
C91 C92 1.392(8) . ?
C92 C93 1.387(8) . ?

loop_
 _geom_angle_atom_site_label_1
 _geom_angle_atom_site_label_2
 _geom_angle_atom_site_label_3
 _geom_angle
 _geom_angle_site_symmetry_1
 _geom_angle_site_symmetry_3
 _geom_angle_publ_flag
C1 Ru1 C2 94.6(2) . . ?
C1 Ru1 P1 100.04(16) . . ?
C2 Ru1 P1 95.41(16) . . ?
C1 Ru1 S1 112.12(16) . . ?
C2 Ru1 S1 91.05(16) . . ?
P1 Ru1 S1 146.56(4) . . ?
C1 Ru1 S2 98.73(17) . . ?
C2 Ru1 S2 164.79(17) . . ?
P1 Ru1 S2 89.37(4) . . ?
S1 Ru1 S2 77.25(4) . . ?
C1 Ru1 Ru2 152.56(16) . . ?
C2 Ru1 Ru2 109.14(17) . . ?
P1 Ru1 Ru2 91.36(3) . . ?
S1 Ru1 Ru2 55.68(3) . . ?
S2 Ru1 Ru2 56.20(3) . . ?
C4 Ru2 C3 97.6(2) . . ?
C4 Ru2 P2 95.82(15) . . ?
C3 Ru2 P2 95.75(16) . . ?
C4 Ru2 S1 90.78(16) . . ?
C3 Ru2 S1 109.01(16) . . ?
P2 Ru2 S1 153.29(4) . . ?
C4 Ru2 S2 154.05(16) . . ?
C3 Ru2 S2 107.92(16) . . ?
P2 Ru2 S2 86.23(4) . . ?
S1 Ru2 S2 76.92(4) . . ?
C4 Ru2 Ru1 98.62(15) . . ?
C3 Ru2 Ru1 157.72(16) . . ?
P2 Ru2 Ru1 97.64(3) . . ?
S1 Ru2 Ru1 55.72(3) . . ?
S2 Ru2 Ru1 55.56(3) . . ?
C9 Ru3 C8 93.7(2) . . ?
C9 Ru3 P3 95.51(15) . . ?
C8 Ru3 P3 101.56(15) . . ?
C9 Ru3 S3 91.77(15) . . ?
C8 Ru3 S3 108.81(15) . . ?
P3 Ru3 S3 148.22(4) . . ?
C9 Ru3 S4 165.21(16) . . ?
C8 Ru3 S4 99.19(16) . . ?
P3 Ru3 S4 89.07(4) . . ?
S3 Ru3 S4 77.23(4) . . ?
C9 Ru3 Ru4 109.20(16) . . ?
C8 Ru3 Ru4 151.77(16) . . ?
P3 Ru3 Ru4 92.71(3) . . ?
S3 Ru3 Ru4 55.79(3) . . ?
S4 Ru3 Ru4 56.42(3) . . ?
C10 Ru4 C11 96.9(2) . . ?
C10 Ru4 P4 95.89(15) . . ?
C11 Ru4 P4 96.12(16) . . ?
C10 Ru4 S3 89.76(16) . . ?
C11 Ru4 S3 109.95(15) . . ?
P4 Ru4 S3 152.47(4) . . ?
C10 Ru4 S4 152.16(17) . . ?
C11 Ru4 S4 110.54(16) . . ?
P4 Ru4 S4 85.89(4) . . ?
S3 Ru4 S4 76.99(4) . . ?
C10 Ru4 Ru3 96.35(17) . . ?
C11 Ru4 Ru3 160.46(15) . . ?
P4 Ru4 Ru3 96.71(3) . . ?
S3 Ru4 Ru3 55.83(3) . . ?
S4 Ru4 Ru3 55.94(3) . . ?
C16 Ru5 C15 93.8(2) . . ?
C16 Ru5 P5 95.76(17) . . ?
C15 Ru5 P5 100.71(15) . . ?
C16 Ru5 S5 90.79(17) . . ?
C15 Ru5 S5 110.49(16) . . ?
P5 Ru5 S5 147.60(5) . . ?
C16 Ru5 S6 164.03(18) . . ?
C15 Ru5 S6 100.28(16) . . ?
P5 Ru5 S6 89.00(4) . . ?
S5 Ru5 S6 77.32(4) . . ?
C16 Ru5 Ru6 108.08(18) . . ?
C15 Ru5 Ru6 153.30(16) . . ?
P5 Ru5 Ru6 92.29(4) . . ?
S5 Ru5 Ru6 55.65(3) . . ?
S6 Ru5 Ru6 56.38(3) . . ?
C18 Ru6 C17 96.8(2) . . ?
C18 Ru6 P6 95.78(15) . . ?
C17 Ru6 P6 95.38(17) . . ?
C18 Ru6 S5 90.23(16) . . ?
C17 Ru6 S5 110.50(17) . . ?
P6 Ru6 S5 152.55(5) . . ?
C18 Ru6 S6 153.83(17) . . ?
C17 Ru6 S6 108.99(16) . . ?
P6 Ru6 S6 86.25(4) . . ?
S5 Ru6 S6 77.01(4) . . ?
C18 Ru6 Ru5 98.17(16) . . ?
C17 Ru6 Ru5 159.53(16) . . ?
P6 Ru6 Ru5 96.89(3) . . ?
S5 Ru6 Ru5 55.70(3) . . ?
S6 Ru6 Ru5 55.75(3) . . ?
C5 S1 Ru2 102.94(18) . . ?
C5 S1 Ru1 105.94(16) . . ?
Ru2 S1 Ru1 68.60(4) . . ?
C6 S2 Ru1 102.44(17) . . ?
C6 S2 Ru2 106.16(16) . . ?
Ru1 S2 Ru2 68.25(4) . . ?
C12 S3 Ru4 103.31(17) . . ?
C12 S3 Ru3 105.85(17) . . ?
Ru4 S3 Ru3 68.38(4) . . ?
C13 S4 Ru3 101.93(17) . . ?
C13 S4 Ru4 106.39(16) . . ?
Ru3 S4 Ru4 67.64(4) . . ?
C19 S5 Ru6 103.53(17) . . ?
C19 S5 Ru5 104.81(17) . . ?
Ru6 S5 Ru5 68.65(4) . . ?
C20 S6 Ru5 101.76(18) . . ?
C20 S6 Ru6 106.15(18) . . ?
Ru5 S6 Ru6 67.87(4) . . ?
C28 P1 C22 101.8(2) . . ?
C28 P1 C7 102.8(2) . . ?
C22 P1 C7 104.1(2) . . ?
C28 P1 Ru1 117.70(15) . . ?
C22 P1 Ru1 117.60(16) . . ?
C7 P1 Ru1 111.01(14) . . ?
C34 P2 C7 106.1(2) . . ?
C34 P2 C40 102.2(2) . . ?
C7 P2 C40 101.8(2) . . ?
C34 P2 Ru2 119.30(16) . . ?
C7 P2 Ru2 108.88(15) . . ?
C40 P2 Ru2 116.79(15) . . ?
C46 P3 C52 101.4(2) . . ?
C46 P3 C14 102.9(2) . . ?
C52 P3 C14 102.8(2) . . ?
C46 P3 Ru3 119.74(15) . . ?
C52 P3 Ru3 116.96(15) . . ?
C14 P3 Ru3 110.84(16) . . ?
C64 P4 C58 102.5(2) . . ?
C64 P4 C14 106.1(2) . . ?
C58 P4 C14 100.6(2) . . ?
C64 P4 Ru4 118.91(16) . . ?
C58 P4 Ru4 116.72(16) . . ?
C14 P4 Ru4 110.06(16) . . ?
C76 P5 C70 102.7(2) . . ?
C76 P5 C21 103.3(2) . . ?
C70 P5 C21 101.9(2) . . ?
C76 P5 Ru5 117.11(17) . . ?
C70 P5 Ru5 118.06(17) . . ?
C21 P5 Ru5 111.65(16) . . ?
C82 P6 C88 101.6(2) . . ?
C82 P6 C21 105.8(2) . . ?
C88 P6 C21 101.2(2) . . ?
C82 P6 Ru6 119.46(15) . . ?
C88 P6 Ru6 116.66(16) . . ?
C21 P6 Ru6 110.09(16) . . ?
O1 C1 Ru1 177.1(6) . . ?
O2 C2 Ru1 176.9(5) . . ?
O3 C3 Ru2 177.3(5) . . ?
O4 C4 Ru2 176.9(5) . . ?
C6 C5 S1 113.1(3) . . ?
C5 C6 S2 112.8(3) . . ?
P2 C7 P1 112.8(2) . . ?
O5 C8 Ru3 178.9(5) . . ?
O6 C9 Ru3 177.2(5) . . ?
O7 C10 Ru4 175.0(5) . . ?
O8 C11 Ru4 176.1(5) . . ?
C13 C12 S3 113.5(3) . . ?
C12 C13 S4 112.7(3) . . ?
P4 C14 P3 111.9(2) . . ?
O9 C15 Ru5 179.7(5) . . ?
O10 C16 Ru5 176.1(5) . . ?
O11 C17 Ru6 176.3(5) . . ?
O12 C18 Ru6 176.1(5) . . ?
C20 C19 S5 113.9(3) . . ?
C19 C20 S6 113.1(4) . . ?
P6 C21 P5 112.6(2) . . ?
C23 C22 C27 119.1(4) . . ?
C23 C22 P1 120.1(3) . . ?
C27 C22 P1 120.7(4) . . ?
C24 C23 C22 121.3(4) . . ?
C25 C24 C23 119.4(5) . . ?
C24 C25 C26 119.8(5) . . ?
C27 C26 C25 121.3(5) . . ?
C26 C27 C22 119.0(5) . . ?
C33 C28 C29 119.2(5) . . ?
C33 C28 P1 123.9(4) . . ?
C29 C28 P1 116.8(4) . . ?
C30 C29 C28 120.5(6) . . ?
C31 C30 C29 120.1(6) . . ?
C32 C31 C30 120.6(5) . . ?
C31 C32 C33 120.1(6) . . ?
C28 C33 C32 119.5(5) . . ?
C35 C34 C39 119.0(4) . . ?
C35 C34 P2 118.0(4) . . ?
C39 C34 P2 122.9(4) . . ?
C36 C35 C34 120.5(5) . . ?
C35 C36 C37 120.5(5) . . ?
C38 C37 C36 120.0(5) . . ?
C37 C38 C39 120.5(5) . . ?
C38 C39 C34 119.5(5) . . ?
C41 C40 C45 118.2(4) . . ?
C41 C40 P2 122.4(4) . . ?
C45 C40 P2 119.4(4) . . ?
C40 C41 C42 121.1(4) . . ?
C43 C42 C41 119.8(5) . . ?
C42 C43 C44 119.8(5) . . ?
C45 C44 C43 120.5(5) . . ?
C44 C45 C40 120.5(5) . . ?
C47 C46 C51 118.4(5) . . ?
C47 C46 P3 121.7(4) . . ?
C51 C46 P3 119.8(4) . . ?
C48 C47 C46 120.8(4) . . ?
C49 C48 C47 120.6(5) . . ?
C50 C49 C48 119.7(4) . . ?
C49 C50 C51 120.6(5) . . ?
C50 C51 C46 120.0(5) . . ?
C57 C52 C53 118.4(4) . . ?
C57 C52 P3 118.3(4) . . ?
C53 C52 P3 123.3(4) . . ?
C54 C53 C52 119.7(5) . . ?
C55 C54 C53 120.4(5) . . ?
C54 C55 C56 120.2(5) . . ?
C57 C56 C55 119.1(5) . . ?
C56 C57 C52 122.2(5) . . ?
C59 C58 C63 117.8(5) . . ?
C59 C58 P4 120.0(4) . . ?
C63 C58 P4 122.2(4) . . ?
C58 C59 C60 121.4(5) . . ?
C61 C60 C59 119.3(5) . . ?
C62 C61 C60 120.7(5) . . ?
C61 C62 C63 119.8(5) . . ?
C58 C63 C62 120.9(5) . . ?
C69 C64 C65 118.9(4) . . ?
C69 C64 P4 117.6(4) . . ?
C65 C64 P4 123.3(4) . . ?
C66 C65 C64 119.9(4) . . ?
C67 C66 C65 119.8(5) . . ?
C66 C67 C68 120.1(5) . . ?
C69 C68 C67 120.5(5) . . ?
C68 C69 C64 120.7(5) . . ?
C75 C70 C71 118.4(5) . . ?
C75 C70 P5 124.3(4) . . ?
C71 C70 P5 117.3(4) . . ?
C72 C71 C70 120.0(5) . . ?
C73 C72 C71 121.2(5) . . ?
C72 C73 C74 118.9(5) . . ?
C75 C74 C73 119.3(6) . . ?
C70 C75 C74 122.3(6) . . ?
C81 C76 C77 118.8(5) . . ?
C81 C76 P5 119.7(4) . . ?
C77 C76 P5 121.4(4) . . ?
C78 C77 C76 120.5(5) . . ?
C77 C78 C79 119.2(5) . . ?
C80 C79 C78 121.0(5) . . ?
C79 C80 C81 119.5(5) . . ?
C76 C81 C80 121.0(5) . . ?
C83 C82 C87 119.5(4) . . ?
C83 C82 P6 123.8(4) . . ?
C87 C82 P6 116.6(4) . . ?
C82 C83 C84 120.2(5) . . ?
C85 C84 C83 120.8(5) . . ?
C86 C85 C84 119.2(5) . . ?
C85 C86 C87 120.8(5) . . ?
C82 C87 C86 119.5(5) . . ?
C93 C88 C89 117.9(5) . . ?
C93 C88 P6 120.1(4) . . ?
C89 C88 P6 122.0(4) . . ?
C88 C89 C90 120.1(5) . . ?
C91 C90 C89 121.5(5) . . ?
C90 C91 C92 119.5(5) . . ?
C93 C92 C91 119.2(5) . . ?
C92 C93 C88 121.8(5) . . ?

loop_
 _geom_torsion_atom_site_label_1
 _geom_torsion_atom_site_label_2
 _geom_torsion_atom_site_label_3
 _geom_torsion_atom_site_label_4
 _geom_torsion
 _geom_torsion_site_symmetry_1
 _geom_torsion_site_symmetry_2
 _geom_torsion_site_symmetry_3
 _geom_torsion_site_symmetry_4
 _geom_torsion_publ_flag
C1 Ru1 Ru2 C4 156.0(4) . . . . ?
C2 Ru1 Ru2 C4 7.4(2) . . . . ?
P1 Ru1 Ru2 C4 -88.85(16) . . . . ?
S1 Ru1 Ru2 C4 85.03(16) . . . . ?
S2 Ru1 Ru2 C4 -177.18(16) . . . . ?
C1 Ru1 Ru2 C3 19.6(5) . . . . ?
C2 Ru1 Ru2 C3 -129.1(4) . . . . ?
P1 Ru1 Ru2 C3 134.7(4) . . . . ?
S1 Ru1 Ru2 C3 -51.4(4) . . . . ?
S2 Ru1 Ru2 C3 46.4(4) . . . . ?
C1 Ru1 Ru2 P2 -106.8(4) . . . . ?
C2 Ru1 Ru2 P2 104.47(17) . . . . ?
P1 Ru1 Ru2 P2 8.26(4) . . . . ?
S1 Ru1 Ru2 P2 -177.85(5) . . . . ?
S2 Ru1 Ru2 P2 -80.07(5) . . . . ?
C1 Ru1 Ru2 S1 71.0(4) . . . . ?
C2 Ru1 Ru2 S1 -77.67(17) . . . . ?
P1 Ru1 Ru2 S1 -173.88(5) . . . . ?
S2 Ru1 Ru2 S1 97.78(5) . . . . ?
C1 Ru1 Ru2 S2 -26.8(4) . . . . ?
C2 Ru1 Ru2 S2 -175.46(17) . . . . ?
P1 Ru1 Ru2 S2 88.33(5) . . . . ?
S1 Ru1 Ru2 S2 -97.78(5) . . . . ?
C9 Ru3 Ru4 C10 -6.7(2) . . . . ?
C8 Ru3 Ru4 C10 -149.1(4) . . . . ?
P3 Ru3 Ru4 C10 90.04(16) . . . . ?
S3 Ru3 Ru4 C10 -85.37(16) . . . . ?
S4 Ru3 Ru4 C10 177.13(16) . . . . ?
C9 Ru3 Ru4 C11 125.8(5) . . . . ?
C8 Ru3 Ru4 C11 -16.6(6) . . . . ?
P3 Ru3 Ru4 C11 -137.4(5) . . . . ?
S3 Ru3 Ru4 C11 47.2(5) . . . . ?
S4 Ru3 Ru4 C11 -50.3(5) . . . . ?
C9 Ru3 Ru4 P4 -103.47(16) . . . . ?
C8 Ru3 Ru4 P4 114.2(3) . . . . ?
P3 Ru3 Ru4 P4 -6.68(4) . . . . ?
S3 Ru3 Ru4 P4 177.91(5) . . . . ?
S4 Ru3 Ru4 P4 80.40(5) . . . . ?
C9 Ru3 Ru4 S3 78.62(16) . . . . ?
C8 Ru3 Ru4 S3 -63.8(3) . . . . ?
P3 Ru3 Ru4 S3 175.42(5) . . . . ?
S4 Ru3 Ru4 S3 -97.50(5) . . . . ?
C9 Ru3 Ru4 S4 176.13(16) . . . . ?
C8 Ru3 Ru4 S4 33.7(3) . . . . ?
P3 Ru3 Ru4 S4 -87.08(5) . . . . ?
S3 Ru3 Ru4 S4 97.50(5) . . . . ?
C16 Ru5 Ru6 C18 6.5(2) . . . . ?
C15 Ru5 Ru6 C18 150.1(4) . . . . ?
P5 Ru5 Ru6 C18 -90.30(15) . . . . ?
S5 Ru5 Ru6 C18 84.66(15) . . . . ?
S6 Ru5 Ru6 C18 -177.57(15) . . . . ?
C16 Ru5 Ru6 C17 -130.2(5) . . . . ?
C15 Ru5 Ru6 C17 13.4(6) . . . . ?
P5 Ru5 Ru6 C17 133.0(5) . . . . ?
S5 Ru5 Ru6 C17 -52.0(5) . . . . ?
S6 Ru5 Ru6 C17 45.7(5) . . . . ?
C16 Ru5 Ru6 P6 103.41(17) . . . . ?
C15 Ru5 Ru6 P6 -113.0(3) . . . . ?
P5 Ru5 Ru6 P6 6.59(4) . . . . ?
S5 Ru5 Ru6 P6 -178.45(5) . . . . ?
S6 Ru5 Ru6 P6 -80.69(5) . . . . ?
C16 Ru5 Ru6 S5 -78.14(17) . . . . ?
C15 Ru5 Ru6 S5 65.5(3) . . . . ?
P5 Ru5 Ru6 S5 -174.96(5) . . . . ?
S6 Ru5 Ru6 S5 97.77(5) . . . . ?
C16 Ru5 Ru6 S6 -175.91(17) . . . . ?
C15 Ru5 Ru6 S6 -32.3(3) . . . . ?
P5 Ru5 Ru6 S6 87.27(5) . . . . ?
S5 Ru5 Ru6 S6 -97.77(5) . . . . ?
C4 Ru2 S1 C5 157.8(2) . . . . ?
C3 Ru2 S1 C5 59.5(2) . . . . ?
P2 Ru2 S1 C5 -97.54(19) . . . . ?
S2 Ru2 S1 C5 -45.26(17) . . . . ?
Ru1 Ru2 S1 C5 -102.28(17) . . . . ?
C4 Ru2 S1 Ru1 -99.91(15) . . . . ?
C3 Ru2 S1 Ru1 161.73(16) . . . . ?
P2 Ru2 S1 Ru1 4.73(10) . . . . ?
S2 Ru2 S1 Ru1 57.02(4) . . . . ?
C1 Ru1 S1 C5 -54.0(3) . . . . ?
C2 Ru1 S1 C5 -149.4(2) . . . . ?
P1 Ru1 S1 C5 109.1(2) . . . . ?
S2 Ru1 S1 C5 40.36(19) . . . . ?
Ru2 Ru1 S1 C5 97.94(19) . . . . ?
C1 Ru1 S1 Ru2 -151.94(18) . . . . ?
C2 Ru1 S1 Ru2 112.62(17) . . . . ?
P1 Ru1 S1 Ru2 11.14(8) . . . . ?
S2 Ru1 S1 Ru2 -57.58(4) . . . . ?
C1 Ru1 S2 C6 65.2(2) . . . . ?
C2 Ru1 S2 C6 -86.1(6) . . . . ?
P1 Ru1 S2 C6 165.29(17) . . . . ?
S1 Ru1 S2 C6 -45.61(17) . . . . ?
Ru2 Ru1 S2 C6 -102.65(17) . . . . ?
C1 Ru1 S2 Ru2 167.88(16) . . . . ?
C2 Ru1 S2 Ru2 16.6(6) . . . . ?
P1 Ru1 S2 Ru2 -92.06(4) . . . . ?
S1 Ru1 S2 Ru2 57.04(4) . . . . ?
C4 Ru2 S2 C6 103.6(4) . . . . ?
C3 Ru2 S2 C6 -66.0(2) . . . . ?
P2 Ru2 S2 C6 -160.84(19) . . . . ?
S1 Ru2 S2 C6 40.04(19) . . . . ?
Ru1 Ru2 S2 C6 97.23(19) . . . . ?
C4 Ru2 S2 Ru1 6.4(4) . . . . ?
C3 Ru2 S2 Ru1 -163.23(16) . . . . ?
P2 Ru2 S2 Ru1 101.93(4) . . . . ?
S1 Ru2 S2 Ru1 -57.19(4) . . . . ?
C10 Ru4 S3 C12 -160.1(2) . . . . ?
C11 Ru4 S3 C12 -62.9(2) . . . . ?
P4 Ru4 S3 C12 97.5(2) . . . . ?
S4 Ru4 S3 C12 44.55(18) . . . . ?
Ru3 Ru4 S3 C12 102.01(18) . . . . ?
C10 Ru4 S3 Ru3 97.85(16) . . . . ?
C11 Ru4 S3 Ru3 -164.87(17) . . . . ?
P4 Ru4 S3 Ru3 -4.50(10) . . . . ?
S4 Ru4 S3 Ru3 -57.46(4) . . . . ?
C9 Ru3 S3 C12 149.5(2) . . . . ?
C8 Ru3 S3 C12 55.0(2) . . . . ?
P3 Ru3 S3 C12 -107.05(19) . . . . ?
S4 Ru3 S3 C12 -40.46(18) . . . . ?
Ru4 Ru3 S3 C12 -98.33(18) . . . . ?
C9 Ru3 S3 Ru4 -112.14(16) . . . . ?
C8 Ru3 S3 Ru4 153.38(16) . . . . ?
P3 Ru3 S3 Ru4 -8.72(9) . . . . ?
S4 Ru3 S3 Ru4 57.88(4) . . . . ?
C9 Ru3 S4 C13 88.5(6) . . . . ?
C8 Ru3 S4 C13 -61.6(2) . . . . ?
P3 Ru3 S4 C13 -163.12(17) . . . . ?
S3 Ru3 S4 C13 45.79(17) . . . . ?
Ru4 Ru3 S4 C13 103.00(17) . . . . ?
C9 Ru3 S4 Ru4 -14.5(6) . . . . ?
C8 Ru3 S4 Ru4 -164.56(15) . . . . ?
P3 Ru3 S4 Ru4 93.87(4) . . . . ?
S3 Ru3 S4 Ru4 -57.22(4) . . . . ?
C10 Ru4 S4 C13 -102.6(4) . . . . ?
C11 Ru4 S4 C13 67.6(2) . . . . ?
P4 Ru4 S4 C13 162.62(18) . . . . ?
S3 Ru4 S4 C13 -39.09(18) . . . . ?
Ru3 Ru4 S4 C13 -96.43(18) . . . . ?
C10 Ru4 S4 Ru3 -6.1(3) . . . . ?
C11 Ru4 S4 Ru3 164.04(16) . . . . ?
P4 Ru4 S4 Ru3 -100.95(4) . . . . ?
S3 Ru4 S4 Ru3 57.34(4) . . . . ?
C18 Ru6 S5 C19 159.4(2) . . . . ?
C17 Ru6 S5 C19 62.0(3) . . . . ?
P6 Ru6 S5 C19 -97.5(2) . . . . ?
S6 Ru6 S5 C19 -43.65(18) . . . . ?
Ru5 Ru6 S5 C19 -100.84(19) . . . . ?
C18 Ru6 S5 Ru5 -99.75(16) . . . . ?
C17 Ru6 S5 Ru5 162.88(17) . . . . ?
P6 Ru6 S5 Ru5 3.33(11) . . . . ?
S6 Ru6 S5 Ru5 57.20(4) . . . . ?
C16 Ru5 S5 C19 -149.5(3) . . . . ?
C15 Ru5 S5 C19 -55.1(3) . . . . ?
P5 Ru5 S5 C19 108.4(2) . . . . ?
S6 Ru5 S5 C19 41.26(19) . . . . ?
Ru6 Ru5 S5 C19 99.00(19) . . . . ?
C16 Ru5 S5 Ru6 111.50(18) . . . . ?
C15 Ru5 S5 Ru6 -154.13(17) . . . . ?
P5 Ru5 S5 Ru6 9.43(9) . . . . ?
S6 Ru5 S5 Ru6 -57.74(4) . . . . ?
C16 Ru5 S6 C20 -88.6(6) . . . . ?
C15 Ru5 S6 C20 63.0(2) . . . . ?
P5 Ru5 S6 C20 163.75(19) . . . . ?
S5 Ru5 S6 C20 -45.85(19) . . . . ?
Ru6 Ru5 S6 C20 -102.83(19) . . . . ?
C16 Ru5 S6 Ru6 14.3(6) . . . . ?
C15 Ru5 S6 Ru6 165.88(15) . . . . ?
P5 Ru5 S6 Ru6 -93.42(4) . . . . ?
S5 Ru5 S6 Ru6 56.98(4) . . . . ?
C18 Ru6 S6 C20 101.8(4) . . . . ?
C17 Ru6 S6 C20 -68.3(3) . . . . ?
P6 Ru6 S6 C20 -162.66(19) . . . . ?
S5 Ru6 S6 C20 39.24(19) . . . . ?
Ru5 Ru6 S6 C20 96.39(19) . . . . ?
C18 Ru6 S6 Ru5 5.5(3) . . . . ?
C17 Ru6 S6 Ru5 -164.64(17) . . . . ?
P6 Ru6 S6 Ru5 100.95(4) . . . . ?
S5 Ru6 S6 Ru5 -57.14(4) . . . . ?
C1 Ru1 P1 C28 6.1(2) . . . . ?
C2 Ru1 P1 C28 101.8(2) . . . . ?
S1 Ru1 P1 C28 -157.98(18) . . . . ?
S2 Ru1 P1 C28 -92.62(18) . . . . ?
Ru2 Ru1 P1 C28 -148.79(18) . . . . ?
C1 Ru1 P1 C22 -116.2(2) . . . . ?
C2 Ru1 P1 C22 -20.5(2) . . . . ?
S1 Ru1 P1 C22 79.65(17) . . . . ?
S2 Ru1 P1 C22 145.00(16) . . . . ?
Ru2 Ru1 P1 C22 88.84(15) . . . . ?
C1 Ru1 P1 C7 124.1(2) . . . . ?
C2 Ru1 P1 C7 -140.2(2) . . . . ?
S1 Ru1 P1 C7 -39.99(18) . . . . ?
S2 Ru1 P1 C7 25.36(15) . . . . ?
Ru2 Ru1 P1 C7 -30.80(15) . . . . ?
C4 Ru2 P2 C34 -7.5(2) . . . . ?
C3 Ru2 P2 C34 90.8(2) . . . . ?
S1 Ru2 P2 C34 -111.02(19) . . . . ?
S2 Ru2 P2 C34 -161.57(18) . . . . ?
Ru1 Ru2 P2 C34 -107.08(18) . . . . ?
C4 Ru2 P2 C7 114.4(2) . . . . ?
C3 Ru2 P2 C7 -147.3(2) . . . . ?
S1 Ru2 P2 C7 10.87(19) . . . . ?
S2 Ru2 P2 C7 -39.68(16) . . . . ?
Ru1 Ru2 P2 C7 14.81(15) . . . . ?
C4 Ru2 P2 C40 -131.2(2) . . . . ?
C3 Ru2 P2 C40 -32.9(2) . . . . ?
S1 Ru2 P2 C40 125.32(18) . . . . ?
S2 Ru2 P2 C40 74.76(16) . . . . ?
Ru1 Ru2 P2 C40 129.26(16) . . . . ?
C9 Ru3 P3 C46 19.6(2) . . . . ?
C8 Ru3 P3 C46 114.5(2) . . . . ?
S3 Ru3 P3 C46 -82.81(19) . . . . ?
S4 Ru3 P3 C46 -146.33(17) . . . . ?
Ru4 Ru3 P3 C46 -90.02(17) . . . . ?
C9 Ru3 P3 C52 -103.6(2) . . . . ?
C8 Ru3 P3 C52 -8.7(2) . . . . ?
S3 Ru3 P3 C52 154.05(17) . . . . ?
S4 Ru3 P3 C52 90.52(17) . . . . ?
Ru4 Ru3 P3 C52 146.84(17) . . . . ?
C9 Ru3 P3 C14 139.0(2) . . . . ?
C8 Ru3 P3 C14 -126.1(2) . . . . ?
S3 Ru3 P3 C14 36.66(18) . . . . ?
S4 Ru3 P3 C14 -26.87(16) . . . . ?
Ru4 Ru3 P3 C14 29.45(16) . . . . ?
C10 Ru4 P4 C64 9.0(2) . . . . ?
C11 Ru4 P4 C64 -88.7(2) . . . . ?
S3 Ru4 P4 C64 109.84(19) . . . . ?
S4 Ru4 P4 C64 161.07(17) . . . . ?
Ru3 Ru4 P4 C64 106.09(17) . . . . ?
C10 Ru4 P4 C58 132.6(2) . . . . ?
C11 Ru4 P4 C58 35.0(2) . . . . ?
S3 Ru4 P4 C58 -126.50(18) . . . . ?
S4 Ru4 P4 C58 -75.27(17) . . . . ?
Ru3 Ru4 P4 C58 -130.25(16) . . . . ?
C10 Ru4 P4 C14 -113.6(2) . . . . ?
C11 Ru4 P4 C14 148.7(2) . . . . ?
S3 Ru4 P4 C14 -12.75(19) . . . . ?
S4 Ru4 P4 C14 38.48(15) . . . . ?
Ru3 Ru4 P4 C14 -16.50(15) . . . . ?
C16 Ru5 P5 C76 -18.2(3) . . . . ?
C15 Ru5 P5 C76 -113.2(2) . . . . ?
S5 Ru5 P5 C76 82.4(2) . . . . ?
S6 Ru5 P5 C76 146.51(18) . . . . ?
Ru6 Ru5 P5 C76 90.22(18) . . . . ?
C16 Ru5 P5 C70 105.3(3) . . . . ?
C15 Ru5 P5 C70 10.3(3) . . . . ?
S5 Ru5 P5 C70 -154.0(2) . . . . ?
S6 Ru5 P5 C70 -89.9(2) . . . . ?
Ru6 Ru5 P5 C70 -146.2(2) . . . . ?
C16 Ru5 P5 C21 -137.0(2) . . . . ?
C15 Ru5 P5 C21 128.0(2) . . . . ?
S5 Ru5 P5 C21 -36.39(18) . . . . ?
S6 Ru5 P5 C21 27.68(16) . . . . ?
Ru6 Ru5 P5 C21 -28.61(15) . . . . ?
C18 Ru6 P6 C82 -8.1(2) . . . . ?
C17 Ru6 P6 C82 89.4(2) . . . . ?
S5 Ru6 P6 C82 -109.8(2) . . . . ?
S6 Ru6 P6 C82 -161.89(19) . . . . ?
Ru5 Ru6 P6 C82 -107.05(18) . . . . ?
C18 Ru6 P6 C88 -130.9(2) . . . . ?
C17 Ru6 P6 C88 -33.5(2) . . . . ?
S5 Ru6 P6 C88 127.31(19) . . . . ?
S6 Ru6 P6 C88 75.25(18) . . . . ?
Ru5 Ru6 P6 C88 130.08(18) . . . . ?
C18 Ru6 P6 C21 114.6(2) . . . . ?
C17 Ru6 P6 C21 -148.0(2) . . . . ?
S5 Ru6 P6 C21 12.8(2) . . . . ?
S6 Ru6 P6 C21 -39.24(15) . . . . ?
Ru5 Ru6 P6 C21 15.59(15) . . . . ?
C2 Ru1 C1 O1 -161(11) . . . . ?
P1 Ru1 C1 O1 -64(11) . . . . ?
S1 Ru1 C1 O1 106(11) . . . . ?
S2 Ru1 C1 O1 26(11) . . . . ?
Ru2 Ru1 C1 O1 49(11) . . . . ?
C1 Ru1 C2 O2 -72(10) . . . . ?
P1 Ru1 C2 O2 -173(100) . . . . ?
S1 Ru1 C2 O2 40(10) . . . . ?
S2 Ru1 C2 O2 79(10) . . . . ?
Ru2 Ru1 C2 O2 94(10) . . . . ?
C4 Ru2 C3 O3 54(12) . . . . ?
P2 Ru2 C3 O3 -43(12) . . . . ?
S1 Ru2 C3 O3 147(12) . . . . ?
S2 Ru2 C3 O3 -131(12) . . . . ?
Ru1 Ru2 C3 O3 -169(100) . . . . ?
C3 Ru2 C4 O4 138(8) . . . . ?
P2 Ru2 C4 O4 -125(8) . . . . ?
S1 Ru2 C4 O4 29(8) . . . . ?
S2 Ru2 C4 O4 -32(9) . . . . ?
Ru1 Ru2 C4 O4 -26(8) . . . . ?
Ru2 S1 C5 C6 45.6(4) . . . . ?
Ru1 S1 C5 C6 -25.5(4) . . . . ?
S1 C5 C6 S2 -13.1(5) . . . . ?
Ru1 S2 C6 C5 45.5(4) . . . . ?
Ru2 S2 C6 C5 -25.1(4) . . . . ?
C34 P2 C7 P1 89.7(3) . . . . ?
C40 P2 C7 P1 -163.8(2) . . . . ?
Ru2 P2 C7 P1 -39.9(2) . . . . ?
C28 P1 C7 P2 175.9(2) . . . . ?
C22 P1 C7 P2 -78.3(3) . . . . ?
Ru1 P1 C7 P2 49.2(2) . . . . ?
C9 Ru3 C8 O5 -141(31) . . . . ?
P3 Ru3 C8 O5 122(31) . . . . ?
S3 Ru3 C8 O5 -48(31) . . . . ?
S4 Ru3 C8 O5 32(31) . . . . ?
Ru4 Ru3 C8 O5 4(31) . . . . ?
C8 Ru3 C9 O6 75(11) . . . . ?
P3 Ru3 C9 O6 177(100) . . . . ?
S3 Ru3 C9 O6 -34(11) . . . . ?
S4 Ru3 C9 O6 -75(11) . . . . ?
Ru4 Ru3 C9 O6 -88(11) . . . . ?
C11 Ru4 C10 O7 -127(6) . . . . ?
P4 Ru4 C10 O7 136(6) . . . . ?
S3 Ru4 C10 O7 -17(6) . . . . ?
S4 Ru4 C10 O7 44(6) . . . . ?
Ru3 Ru4 C10 O7 39(6) . . . . ?
C10 Ru4 C11 O8 -24(7) . . . . ?
P4 Ru4 C11 O8 73(7) . . . . ?
S3 Ru4 C11 O8 -116(7) . . . . ?
S4 Ru4 C11 O8 161(7) . . . . ?
Ru3 Ru4 C11 O8 -156(7) . . . . ?
Ru4 S3 C12 C13 -45.5(4) . . . . ?
Ru3 S3 C12 C13 25.4(4) . . . . ?
S3 C12 C13 S4 13.5(5) . . . . ?
Ru3 S4 C13 C12 -45.8(4) . . . . ?
Ru4 S4 C13 C12 24.1(4) . . . . ?
C64 P4 C14 P3 -89.3(3) . . . . ?
C58 P4 C14 P3 164.3(2) . . . . ?
Ru4 P4 C14 P3 40.6(3) . . . . ?
C46 P3 C14 P4 81.5(3) . . . . ?
C52 P3 C14 P4 -173.4(2) . . . . ?
Ru3 P3 C14 P4 -47.7(3) . . . . ?
C16 Ru5 C15 O9 -33(100) . . . . ?
P5 Ru5 C15 O9 63(100) . . . . ?
S5 Ru5 C15 O9 -126(100) . . . . ?
S6 Ru5 C15 O9 154(100) . . . . ?
Ru6 Ru5 C15 O9 -179(100) . . . . ?
C15 Ru5 C16 O10 -76(8) . . . . ?
P5 Ru5 C16 O10 -177(100) . . . . ?
S5 Ru5 C16 O10 35(8) . . . . ?
S6 Ru5 C16 O10 76(8) . . . . ?
Ru6 Ru5 C16 O10 89(8) . . . . ?
C18 Ru6 C17 O11 39(8) . . . . ?
P6 Ru6 C17 O11 -58(8) . . . . ?
S5 Ru6 C17 O11 132(8) . . . . ?
S6 Ru6 C17 O11 -145(8) . . . . ?
Ru5 Ru6 C17 O11 176(100) . . . . ?
C17 Ru6 C18 O12 147(7) . . . . ?
P6 Ru6 C18 O12 -117(7) . . . . ?
S5 Ru6 C18 O12 36(7) . . . . ?
S6 Ru6 C18 O12 -24(7) . . . . ?
Ru5 Ru6 C18 O12 -19(7) . . . . ?
Ru6 S5 C19 C20 43.6(4) . . . . ?
Ru5 S5 C19 C20 -27.5(4) . . . . ?
S5 C19 C20 S6 -11.4(5) . . . . ?
Ru5 S6 C20 C19 44.6(4) . . . . ?
Ru6 S6 C20 C19 -25.6(4) . . . . ?
C82 P6 C21 P5 91.4(3) . . . . ?
C88 P6 C21 P5 -163.0(2) . . . . ?
Ru6 P6 C21 P5 -39.0(3) . . . . ?
C76 P5 C21 P6 -80.5(3) . . . . ?
C70 P5 C21 P6 173.2(2) . . . . ?
Ru5 P5 C21 P6 46.3(3) . . . . ?
C28 P1 C22 C23 -159.5(4) . . . . ?
C7 P1 C22 C23 93.9(4) . . . . ?
Ru1 P1 C22 C23 -29.3(4) . . . . ?
C28 P1 C22 C27 22.9(4) . . . . ?
C7 P1 C22 C27 -83.6(4) . . . . ?
Ru1 P1 C22 C27 153.1(3) . . . . ?
C27 C22 C23 C24 0.0(7) . . . . ?
P1 C22 C23 C24 -177.6(4) . . . . ?
C22 C23 C24 C25 -1.5(8) . . . . ?
C23 C24 C25 C26 1.3(8) . . . . ?
C24 C25 C26 C27 0.4(8) . . . . ?
C25 C26 C27 C22 -1.9(8) . . . . ?
C23 C22 C27 C26 1.7(7) . . . . ?
P1 C22 C27 C26 179.2(4) . . . . ?
C22 P1 C28 C33 -105.9(4) . . . . ?
C7 P1 C28 C33 1.7(5) . . . . ?
Ru1 P1 C28 C33 124.0(4) . . . . ?
C22 P1 C28 C29 71.1(4) . . . . ?
C7 P1 C28 C29 178.7(4) . . . . ?
Ru1 P1 C28 C29 -59.0(4) . . . . ?
C33 C28 C29 C30 0.3(8) . . . . ?
P1 C28 C29 C30 -176.9(4) . . . . ?
C28 C29 C30 C31 0.8(8) . . . . ?
C29 C30 C31 C32 -1.4(9) . . . . ?
C30 C31 C32 C33 1.0(10) . . . . ?
C29 C28 C33 C32 -0.6(8) . . . . ?
P1 C28 C33 C32 176.3(4) . . . . ?
C31 C32 C33 C28 0.0(9) . . . . ?
C7 P2 C34 C35 -172.0(4) . . . . ?
C40 P2 C34 C35 81.7(4) . . . . ?
Ru2 P2 C34 C35 -48.8(4) . . . . ?
C7 P2 C34 C39 12.5(5) . . . . ?
C40 P2 C34 C39 -93.7(4) . . . . ?
Ru2 P2 C34 C39 135.8(4) . . . . ?
C39 C34 C35 C36 -2.5(7) . . . . ?
P2 C34 C35 C36 -178.2(4) . . . . ?
C34 C35 C36 C37 0.5(8) . . . . ?
C35 C36 C37 C38 1.1(8) . . . . ?
C36 C37 C38 C39 -0.6(8) . . . . ?
C37 C38 C39 C34 -1.4(7) . . . . ?
C35 C34 C39 C38 3.0(7) . . . . ?
P2 C34 C39 C38 178.4(4) . . . . ?
C34 P2 C40 C41 22.7(4) . . . . ?
C7 P2 C40 C41 -86.8(4) . . . . ?
Ru2 P2 C40 C41 154.8(3) . . . . ?
C34 P2 C40 C45 -157.0(4) . . . . ?
C7 P2 C40 C45 93.4(4) . . . . ?
Ru2 P2 C40 C45 -25.0(4) . . . . ?
C45 C40 C41 C42 1.1(7) . . . . ?
P2 C40 C41 C42 -178.6(4) . . . . ?
C40 C41 C42 C43 -1.0(8) . . . . ?
C41 C42 C43 C44 0.0(8) . . . . ?
C42 C43 C44 C45 0.9(8) . . . . ?
C43 C44 C45 C40 -0.9(8) . . . . ?
C41 C40 C45 C44 -0.2(7) . . . . ?
P2 C40 C45 C44 179.6(4) . . . . ?
C52 P3 C46 C47 -25.7(4) . . . . ?
C14 P3 C46 C47 80.5(4) . . . . ?
Ru3 P3 C46 C47 -156.1(3) . . . . ?
C52 P3 C46 C51 157.9(4) . . . . ?
C14 P3 C46 C51 -96.0(4) . . . . ?
Ru3 P3 C46 C51 27.4(4) . . . . ?
C51 C46 C47 C48 -0.5(7) . . . . ?
P3 C46 C47 C48 -176.9(4) . . . . ?
C46 C47 C48 C49 0.1(8) . . . . ?
C47 C48 C49 C50 0.5(8) . . . . ?
C48 C49 C50 C51 -0.7(8) . . . . ?
C49 C50 C51 C46 0.4(8) . . . . ?
C47 C46 C51 C50 0.2(7) . . . . ?
P3 C46 C51 C50 176.8(4) . . . . ?
C46 P3 C52 C57 -75.8(4) . . . . ?
C14 P3 C52 C57 178.0(4) . . . . ?
Ru3 P3 C52 C57 56.4(4) . . . . ?
C46 P3 C52 C53 104.1(4) . . . . ?
C14 P3 C52 C53 -2.1(5) . . . . ?
Ru3 P3 C52 C53 -123.8(4) . . . . ?
C57 C52 C53 C54 -0.7(7) . . . . ?
P3 C52 C53 C54 179.4(4) . . . . ?
C52 C53 C54 C55 2.2(8) . . . . ?
C53 C54 C55 C56 -1.8(8) . . . . ?
C54 C55 C56 C57 0.1(8) . . . . ?
C55 C56 C57 C52 1.4(8) . . . . ?
C53 C52 C57 C56 -1.1(7) . . . . ?
P3 C52 C57 C56 178.8(4) . . . . ?
C64 P4 C58 C59 149.4(4) . . . . ?
C14 P4 C58 C59 -101.3(4) . . . . ?
Ru4 P4 C58 C59 17.7(5) . . . . ?
C64 P4 C58 C63 -28.8(5) . . . . ?
C14 P4 C58 C63 80.5(4) . . . . ?
Ru4 P4 C58 C63 -160.5(4) . . . . ?
C63 C58 C59 C60 -0.3(9) . . . . ?
P4 C58 C59 C60 -178.6(5) . . . . ?
C58 C59 C60 C61 0.2(10) . . . . ?
C59 C60 C61 C62 0.4(10) . . . . ?
C60 C61 C62 C63 -0.9(9) . . . . ?
C59 C58 C63 C62 -0.3(8) . . . . ?
P4 C58 C63 C62 178.0(4) . . . . ?
C61 C62 C63 C58 0.9(8) . . . . ?
C58 P4 C64 C69 -85.3(4) . . . . ?
C14 P4 C64 C69 169.6(4) . . . . ?
Ru4 P4 C64 C69 45.1(4) . . . . ?
C58 P4 C64 C65 91.1(4) . . . . ?
C14 P4 C64 C65 -14.0(4) . . . . ?
Ru4 P4 C64 C65 -138.5(3) . . . . ?
C69 C64 C65 C66 -1.0(7) . . . . ?
P4 C64 C65 C66 -177.4(3) . . . . ?
C64 C65 C66 C67 0.7(7) . . . . ?
C65 C66 C67 C68 -0.8(8) . . . . ?
C66 C67 C68 C69 1.3(8) . . . . ?
C67 C68 C69 C64 -1.6(8) . . . . ?
C65 C64 C69 C68 1.5(7) . . . . ?
P4 C64 C69 C68 178.1(4) . . . . ?
C76 P5 C70 C75 -106.2(5) . . . . ?
C21 P5 C70 C75 0.6(5) . . . . ?
Ru5 P5 C70 C75 123.3(4) . . . . ?
C76 P5 C70 C71 73.4(4) . . . . ?
C21 P5 C70 C71 -179.8(4) . . . . ?
Ru5 P5 C70 C71 -57.1(4) . . . . ?
C75 C70 C71 C72 0.9(8) . . . . ?
P5 C70 C71 C72 -178.7(4) . . . . ?
C70 C71 C72 C73 -1.5(8) . . . . ?
C71 C72 C73 C74 0.6(8) . . . . ?
C72 C73 C74 C75 0.9(8) . . . . ?
C71 C70 C75 C74 0.6(8) . . . . ?
P5 C70 C75 C74 -179.8(4) . . . . ?
C73 C74 C75 C70 -1.5(9) . . . . ?
C70 P5 C76 C81 -162.2(4) . . . . ?
C21 P5 C76 C81 92.1(4) . . . . ?
Ru5 P5 C76 C81 -31.1(5) . . . . ?
C70 P5 C76 C77 21.5(5) . . . . ?
C21 P5 C76 C77 -84.3(4) . . . . ?
Ru5 P5 C76 C77 152.5(4) . . . . ?
C81 C76 C77 C78 1.6(7) . . . . ?
P5 C76 C77 C78 178.0(4) . . . . ?
C76 C77 C78 C79 -0.9(8) . . . . ?
C77 C78 C79 C80 -0.1(8) . . . . ?
C78 C79 C80 C81 0.5(8) . . . . ?
C77 C76 C81 C80 -1.3(7) . . . . ?
P5 C76 C81 C80 -177.7(4) . . . . ?
C79 C80 C81 C76 0.2(8) . . . . ?
C88 P6 C82 C83 -94.6(4) . . . . ?
C21 P6 C82 C83 10.7(5) . . . . ?
Ru6 P6 C82 C83 135.5(4) . . . . ?
C88 P6 C82 C87 81.4(4) . . . . ?
C21 P6 C82 C87 -173.3(4) . . . . ?
Ru6 P6 C82 C87 -48.6(4) . . . . ?
C87 C82 C83 C84 1.3(8) . . . . ?
P6 C82 C83 C84 177.2(4) . . . . ?
C82 C83 C84 C85 0.4(8) . . . . ?
C83 C84 C85 C86 -2.5(8) . . . . ?
C84 C85 C86 C87 3.0(8) . . . . ?
C83 C82 C87 C86 -0.8(7) . . . . ?
P6 C82 C87 C86 -177.0(4) . . . . ?
C85 C86 C87 C82 -1.4(8) . . . . ?
C82 P6 C88 C93 -153.3(4) . . . . ?
C21 P6 C88 C93 97.8(5) . . . . ?
Ru6 P6 C88 C93 -21.6(5) . . . . ?
C82 P6 C88 C89 25.2(5) . . . . ?
C21 P6 C88 C89 -83.7(4) . . . . ?
Ru6 P6 C88 C89 156.9(4) . . . . ?
C93 C88 C89 C90 -1.3(8) . . . . ?
P6 C88 C89 C90 -179.8(4) . . . . ?
C88 C89 C90 C91 1.2(9) . . . . ?
C89 C90 C91 C92 -0.1(9) . . . . ?
C90 C91 C92 C93 -0.9(10) . . . . ?
C91 C92 C93 C88 0.7(10) . . . . ?
C89 C88 C93 C92 0.3(9) . . . . ?
P6 C88 C93 C92 178.9(5) . . . . ?

_diffrn_measured_fraction_theta_max    0.960
_diffrn_reflns_theta_full              26.00
_diffrn_measured_fraction_theta_full   0.997
_refine_diff_density_max    0.834
_refine_diff_density_min   -0.803
_refine_diff_density_rms    0.118


data_str0801

_audit_creation_method            SHELXL-97
_chemical_name_systematic
;
 ?
;
_chemical_name_common             ?
_chemical_melting_point           ?
_chemical_formula_moiety          ?
_chemical_formula_sum
 'C31 H28 Fe2 O4 P2 S2'
_chemical_formula_weight          702.29

loop_
 _atom_type_symbol
 _atom_type_description
 _atom_type_scat_dispersion_real
 _atom_type_scat_dispersion_imag
 _atom_type_scat_source
 'C'  'C'   0.0033   0.0016
 'International Tables Vol C Tables 4.2.6.8 and 6.1.1.4'
 'H'  'H'   0.0000   0.0000
 'International Tables Vol C Tables 4.2.6.8 and 6.1.1.4'
 'O'  'O'   0.0106   0.0060
 'International Tables Vol C Tables 4.2.6.8 and 6.1.1.4'
 'P'  'P'   0.1023   0.0942
 'International Tables Vol C Tables 4.2.6.8 and 6.1.1.4'
 'S'  'S'   0.1246   0.1234
 'International Tables Vol C Tables 4.2.6.8 and 6.1.1.4'
 'Fe'  'Fe'   0.3463   0.8444
 'International Tables Vol C Tables 4.2.6.8 and 6.1.1.4'

_symmetry_cell_setting            triclinic
_symmetry_space_group_name_H-M    P1bar

loop_
 _symmetry_equiv_pos_as_xyz
 'x, y, z'
 '-x, -y, -z'

_cell_length_a                    9.2906(6)
_cell_length_b                    10.9286(8)
_cell_length_c                    15.8512(11)
_cell_angle_alpha                 77.8100(10)
_cell_angle_beta                  84.1790(10)
_cell_angle_gamma                 73.6400(10)
_cell_volume                      1507.93(18)
_cell_formula_units_Z             2
_cell_measurement_temperature     123(2)
_cell_measurement_reflns_used     ?
_cell_measurement_theta_min       ?
_cell_measurement_theta_max       ?

_exptl_crystal_description        block
_exptl_crystal_colour             red
_exptl_crystal_size_max           0.38
_exptl_crystal_size_mid           0.36
_exptl_crystal_size_min           0.31
_exptl_crystal_density_meas       ?
_exptl_crystal_density_diffrn     1.547
_exptl_crystal_density_method     'not measured'
_exptl_crystal_F_000              720
_exptl_absorpt_coefficient_mu     1.242
_exptl_absorpt_correction_type    multi-scan
_exptl_absorpt_correction_T_min   0.6496
_exptl_absorpt_correction_T_max   0.6993
_exptl_absorpt_process_details    ?

_exptl_special_details
;
 ?
;

_diffrn_ambient_temperature       123(2)
_diffrn_radiation_wavelength      0.71073
_diffrn_radiation_type            MoK\a
_diffrn_radiation_source          'fine-focus sealed tube'
_diffrn_radiation_monochromator   graphite
_diffrn_measurement_device_type   'Bruker SMART APEX diffractometer'
_diffrn_measurement_method        '\w rotation with narrow frames'
_diffrn_detector_area_resol_mean  ?
_diffrn_standards_number          ?
_diffrn_standards_interval_count  ?
_diffrn_standards_interval_time   ?
_diffrn_standards_decay_%         ?
_diffrn_reflns_number             12339
_diffrn_reflns_av_R_equivalents   0.0168
_diffrn_reflns_av_sigmaI/netI     0.0287
_diffrn_reflns_limit_h_min        -11
_diffrn_reflns_limit_h_max        12
_diffrn_reflns_limit_k_min        -14
_diffrn_reflns_limit_k_max        13
_diffrn_reflns_limit_l_min        -20
_diffrn_reflns_limit_l_max        21
_diffrn_reflns_theta_min          1.98
_diffrn_reflns_theta_max          28.23
_reflns_number_total              6613
_reflns_number_gt                 5956
_reflns_threshold_expression      I>2\s(I)

_computing_data_collection        'Bruker SMART'
_computing_cell_refinement        'Bruker SAINT'
_computing_data_reduction         'Bruker SAINT'
_computing_structure_solution     'SHELXS-97 (Sheldrick, 1990)'
_computing_structure_refinement   'SHELXL-97 (Sheldrick, 1997)'
_computing_molecular_graphics     ?
_computing_publication_material   ?

_refine_special_details
;
 Refinement of F^2^ against ALL reflections.  The weighted R-factor wR and
 goodness of fit S are based on F^2^, conventional R-factors R are based
 on F, with F set to zero for negative F^2^. The threshold expression of
 F^2^ > 2sigma(F^2^) is used only for calculating R-factors(gt) etc. and is
 not relevant to the choice of reflections for refinement.  R-factors based
 on F^2^ are statistically about twice as large as those based on F, and R-
 factors based on ALL data will be even larger.
;

_refine_ls_structure_factor_coef  Fsqd
_refine_ls_matrix_type            full
_refine_ls_weighting_scheme       calc
_refine_ls_weighting_details
 'calc w=1/[\s^2^(Fo^2^)+(0.0440P)^2^+0.7297P] where P=(Fo^2^+2Fc^2^)/3'
_atom_sites_solution_primary      heavy
_atom_sites_solution_secondary    difmap
_atom_sites_solution_hydrogens    geom
_refine_ls_hydrogen_treatment     constr
_refine_ls_extinction_method      none
_refine_ls_extinction_coef        ?
_refine_ls_number_reflns          6613
_refine_ls_number_parameters      370
_refine_ls_number_restraints      0
_refine_ls_R_factor_all           0.0331
_refine_ls_R_factor_gt            0.0293
_refine_ls_wR_factor_ref          0.0797
_refine_ls_wR_factor_gt           0.0772
_refine_ls_goodness_of_fit_ref    1.049
_refine_ls_restrained_S_all       1.049
_refine_ls_shift/su_max           0.001
_refine_ls_shift/su_mean          0.000

loop_
 _atom_site_label
 _atom_site_type_symbol
 _atom_site_fract_x
 _atom_site_fract_y
 _atom_site_fract_z
 _atom_site_U_iso_or_equiv
 _atom_site_adp_type
 _atom_site_occupancy
 _atom_site_symmetry_multiplicity
 _atom_site_calc_flag
 _atom_site_refinement_flags
 _atom_site_disorder_assembly
 _atom_site_disorder_group
Fe1 Fe 0.21256(3) 0.63617(2) 0.277646(16) 0.01150(7) Uani 1 1 d . . .
Fe2 Fe 0.12736(3) 0.81273(2) 0.365348(16) 0.01011(7) Uani 1 1 d . . .
P1 P 0.40673(5) 0.69232(4) 0.20285(3) 0.01095(10) Uani 1 1 d . . .
P2 P 0.27604(5) 0.92750(4) 0.28823(3) 0.00968(10) Uani 1 1 d . . .
S1 S 0.02017(5) 0.64793(4) 0.37713(3) 0.01387(10) Uani 1 1 d . . .
S2 S 0.33200(5) 0.64135(4) 0.39527(3) 0.01237(10) Uani 1 1 d . . .
O1 O 0.2768(2) 0.37386(16) 0.24236(13) 0.0472(5) Uani 1 1 d . . .
O2 O 0.01080(18) 0.76037(16) 0.13754(10) 0.0301(4) Uani 1 1 d . . .
O3 O 0.12476(16) 0.87065(15) 0.53741(9) 0.0230(3) Uani 1 1 d . . .
O4 O -0.14676(15) 1.00552(15) 0.30375(10) 0.0254(3) Uani 1 1 d . . .
C1 C 0.2539(2) 0.4744(2) 0.25881(13) 0.0230(4) Uani 1 1 d . . .
C2 C 0.0928(2) 0.71123(19) 0.19222(12) 0.0182(4) Uani 1 1 d . . .
C3 C 0.12040(19) 0.85144(18) 0.46933(12) 0.0143(4) Uani 1 1 d . . .
C4 C -0.0367(2) 0.93049(18) 0.32715(12) 0.0155(4) Uani 1 1 d . . .
C5 C -0.1650(2) 0.6963(2) 0.33283(13) 0.0207(4) Uani 1 1 d . . .
H5A H -0.2041 0.6201 0.3402 0.031 Uiso 1 1 calc R . .
H5B H -0.1577 0.7339 0.2712 0.031 Uiso 1 1 calc R . .
H5C H -0.2329 0.7610 0.3632 0.031 Uiso 1 1 calc R . .
C6 C 0.2958(2) 0.5321(2) 0.49452(13) 0.0215(4) Uani 1 1 d . . .
H6A H 0.3514 0.5408 0.5413 0.032 Uiso 1 1 calc R . .
H6B H 0.3285 0.4423 0.4854 0.032 Uiso 1 1 calc R . .
H6C H 0.1880 0.5546 0.5101 0.032 Uiso 1 1 calc R . .
C7 C 0.44915(19) 0.82524(17) 0.24280(11) 0.0113(3) Uani 1 1 d . . .
H7A H 0.4928 0.8796 0.1947 0.014 Uiso 1 1 calc R . .
H7B H 0.5240 0.7879 0.2879 0.014 Uiso 1 1 calc R . .
C8 C 0.5901(2) 0.57048(17) 0.20832(12) 0.0140(4) Uani 1 1 d . . .
C9 C 0.6117(2) 0.45275(19) 0.26765(12) 0.0189(4) Uani 1 1 d . . .
H9A H 0.5308 0.4353 0.3055 0.023 Uiso 1 1 calc R . .
C10 C 0.7508(2) 0.36119(19) 0.27157(13) 0.0228(4) Uani 1 1 d . . .
H10A H 0.7642 0.2816 0.3120 0.027 Uiso 1 1 calc R . .
C11 C 0.8698(2) 0.3854(2) 0.21692(14) 0.0241(4) Uani 1 1 d . . .
H11A H 0.9644 0.3225 0.2196 0.029 Uiso 1 1 calc R . .
C12 C 0.8501(2) 0.5023(2) 0.15797(14) 0.0218(4) Uani 1 1 d . . .
H12A H 0.9317 0.5196 0.1207 0.026 Uiso 1 1 calc R . .
C13 C 0.7108(2) 0.59398(19) 0.15365(13) 0.0182(4) Uani 1 1 d . . .
H13A H 0.6980 0.6734 0.1130 0.022 Uiso 1 1 calc R . .
C14 C 0.38944(19) 0.74458(18) 0.08589(11) 0.0135(4) Uani 1 1 d . . .
C15 C 0.3762(2) 0.65107(19) 0.04048(13) 0.0194(4) Uani 1 1 d . . .
H15A H 0.3799 0.5654 0.0706 0.023 Uiso 1 1 calc R . .
C16 C 0.3578(2) 0.6828(2) -0.04813(13) 0.0226(4) Uani 1 1 d . . .
H16A H 0.3514 0.6183 -0.0783 0.027 Uiso 1 1 calc R . .
C17 C 0.3486(2) 0.8084(2) -0.09271(13) 0.0241(4) Uani 1 1 d . . .
H17A H 0.3348 0.8302 -0.1532 0.029 Uiso 1 1 calc R . .
C18 C 0.3598(2) 0.9014(2) -0.04838(13) 0.0224(4) Uani 1 1 d . . .
H18A H 0.3524 0.9877 -0.0786 0.027 Uiso 1 1 calc R . .
C19 C 0.3817(2) 0.86978(19) 0.04042(12) 0.0169(4) Uani 1 1 d . . .
H19A H 0.3914 0.9341 0.0698 0.020 Uiso 1 1 calc R . .
C20 C 0.20669(19) 1.04919(17) 0.19209(11) 0.0119(3) Uani 1 1 d . . .
C21 C 0.0904(2) 1.04171(19) 0.14533(12) 0.0158(4) Uani 1 1 d . . .
H21A H 0.0403 0.9756 0.1655 0.019 Uiso 1 1 calc R . .
C22 C 0.0481(2) 1.1303(2) 0.06985(13) 0.0206(4) Uani 1 1 d . . .
H22A H -0.0302 1.1241 0.0382 0.025 Uiso 1 1 calc R . .
C23 C 0.1192(2) 1.2277(2) 0.04028(13) 0.0225(4) Uani 1 1 d . . .
H23A H 0.0886 1.2890 -0.0111 0.027 Uiso 1 1 calc R . .
C24 C 0.2347(2) 1.23612(19) 0.08552(13) 0.0212(4) Uani 1 1 d . . .
H24A H 0.2839 1.3028 0.0649 0.025 Uiso 1 1 calc R . .
C25 C 0.2789(2) 1.14713(18) 0.16096(12) 0.0155(4) Uani 1 1 d . . .
H25A H 0.3587 1.1529 0.1916 0.019 Uiso 1 1 calc R . .
C26 C 0.3437(2) 1.02485(17) 0.34788(11) 0.0124(3) Uani 1 1 d . . .
C27 C 0.2337(2) 1.11079(19) 0.39014(13) 0.0186(4) Uani 1 1 d . . .
H27A H 0.1308 1.1152 0.3869 0.022 Uiso 1 1 calc R . .
C28 C 0.2737(2) 1.1899(2) 0.43698(14) 0.0233(4) Uani 1 1 d . . .
H28A H 0.1983 1.2485 0.4650 0.028 Uiso 1 1 calc R . .
C29 C 0.4241(3) 1.1827(2) 0.44242(14) 0.0242(4) Uani 1 1 d . . .
H29A H 0.4518 1.2354 0.4750 0.029 Uiso 1 1 calc R . .
C30 C 0.5335(2) 1.0991(2) 0.40061(14) 0.0226(4) Uani 1 1 d . . .
H30A H 0.6362 1.0951 0.4042 0.027 Uiso 1 1 calc R . .
C31 C 0.4942(2) 1.02030(19) 0.35301(13) 0.0173(4) Uani 1 1 d . . .
H31A H 0.5702 0.9635 0.3241 0.021 Uiso 1 1 calc R . .

loop_
 _atom_site_aniso_label
 _atom_site_aniso_U_11
 _atom_site_aniso_U_22
 _atom_site_aniso_U_33
 _atom_site_aniso_U_23
 _atom_site_aniso_U_13
 _atom_site_aniso_U_12
Fe1 0.01457(13) 0.01166(13) 0.00989(13) -0.00284(10) -0.00095(10) -0.00538(10)
Fe2 0.01008(12) 0.01098(13) 0.00957(13) -0.00234(10) -0.00063(9) -0.00297(9)
P1 0.0134(2) 0.0100(2) 0.0097(2) -0.00319(17) -0.00003(17) -0.00269(17)
P2 0.0101(2) 0.0094(2) 0.0100(2) -0.00250(16) -0.00083(16) -0.00272(16)
S1 0.0143(2) 0.0161(2) 0.0128(2) -0.00141(17) -0.00095(17) -0.00744(17)
S2 0.0134(2) 0.0121(2) 0.0110(2) -0.00191(16) -0.00187(16) -0.00218(16)
O1 0.0772(14) 0.0207(9) 0.0510(12) -0.0173(8) -0.0104(10) -0.0144(9)
O2 0.0340(9) 0.0389(9) 0.0202(8) 0.0031(7) -0.0134(7) -0.0165(7)
O3 0.0237(7) 0.0305(8) 0.0150(7) -0.0093(6) -0.0004(6) -0.0039(6)
O4 0.0151(7) 0.0270(8) 0.0278(8) -0.0016(6) -0.0040(6) 0.0025(6)
C1 0.0327(11) 0.0194(10) 0.0194(10) -0.0030(8) -0.0038(8) -0.0106(8)
C2 0.0206(9) 0.0227(10) 0.0153(9) -0.0040(8) -0.0001(8) -0.0120(8)
C3 0.0110(8) 0.0152(9) 0.0163(9) -0.0031(7) -0.0003(7) -0.0030(7)
C4 0.0164(9) 0.0176(9) 0.0134(9) -0.0037(7) 0.0026(7) -0.0065(7)
C5 0.0149(9) 0.0281(11) 0.0220(10) -0.0046(8) -0.0024(8) -0.0099(8)
C6 0.0254(10) 0.0193(10) 0.0151(9) 0.0040(8) -0.0037(8) -0.0030(8)
C7 0.0106(8) 0.0113(8) 0.0127(8) -0.0042(7) 0.0009(6) -0.0030(6)
C8 0.0174(9) 0.0127(8) 0.0123(8) -0.0054(7) -0.0018(7) -0.0023(7)
C9 0.0231(10) 0.0167(9) 0.0141(9) -0.0024(7) 0.0020(8) -0.0024(8)
C10 0.0293(11) 0.0140(9) 0.0193(10) 0.0006(8) -0.0036(8) 0.0018(8)
C11 0.0200(10) 0.0204(10) 0.0281(11) -0.0067(9) -0.0034(8) 0.0029(8)
C12 0.0181(9) 0.0202(10) 0.0251(11) -0.0040(8) 0.0012(8) -0.0030(8)
C13 0.0195(9) 0.0150(9) 0.0194(10) -0.0029(8) 0.0004(8) -0.0041(7)
C14 0.0118(8) 0.0174(9) 0.0106(8) -0.0045(7) 0.0010(7) -0.0019(7)
C15 0.0237(10) 0.0178(9) 0.0180(10) -0.0061(8) -0.0030(8) -0.0051(8)
C16 0.0260(10) 0.0276(11) 0.0169(10) -0.0108(8) -0.0041(8) -0.0056(9)
C17 0.0206(10) 0.0370(12) 0.0124(9) -0.0038(9) -0.0013(8) -0.0047(9)
C18 0.0247(10) 0.0231(10) 0.0159(9) 0.0035(8) 0.0003(8) -0.0065(8)
C19 0.0189(9) 0.0178(9) 0.0137(9) -0.0038(7) 0.0026(7) -0.0047(7)
C20 0.0137(8) 0.0105(8) 0.0100(8) -0.0026(7) 0.0006(7) -0.0008(6)
C21 0.0139(8) 0.0195(9) 0.0145(9) -0.0032(7) -0.0002(7) -0.0055(7)
C22 0.0173(9) 0.0279(11) 0.0155(9) -0.0020(8) -0.0043(7) -0.0045(8)
C23 0.0261(10) 0.0225(10) 0.0147(9) 0.0037(8) -0.0034(8) -0.0044(8)
C24 0.0298(11) 0.0174(9) 0.0164(9) 0.0007(8) 0.0001(8) -0.0099(8)
C25 0.0183(9) 0.0155(9) 0.0141(9) -0.0038(7) -0.0007(7) -0.0058(7)
C26 0.0165(8) 0.0110(8) 0.0112(8) -0.0023(7) -0.0016(7) -0.0058(7)
C27 0.0196(9) 0.0177(9) 0.0202(10) -0.0080(8) 0.0030(8) -0.0055(8)
C28 0.0292(11) 0.0200(10) 0.0237(10) -0.0131(8) 0.0040(9) -0.0067(8)
C29 0.0358(12) 0.0211(10) 0.0228(10) -0.0109(8) -0.0025(9) -0.0134(9)
C30 0.0218(10) 0.0264(11) 0.0251(11) -0.0076(9) -0.0044(8) -0.0120(8)
C31 0.0160(9) 0.0185(9) 0.0186(9) -0.0066(8) -0.0005(7) -0.0045(7)

_geom_special_details
;
 All esds (except the esd in the dihedral angle between two l.s. planes)
 are estimated using the full covariance matrix.  The cell esds are taken
 into account individually in the estimation of esds in distances, angles
 and torsion angles; correlations between esds in cell parameters are only
 used when they are defined by crystal symmetry.  An approximate (isotropic)
 treatment of cell esds is used for estimating esds involving l.s. planes.
;

loop_
 _geom_bond_atom_site_label_1
 _geom_bond_atom_site_label_2
 _geom_bond_distance
 _geom_bond_site_symmetry_2
 _geom_bond_publ_flag
Fe1 C2 1.751(2) . ?
Fe1 C1 1.783(2) . ?
Fe1 P1 2.2179(5) . ?
Fe1 S1 2.2545(5) . ?
Fe1 S2 2.2826(5) . ?
Fe1 Fe2 2.5162(4) . ?
Fe2 C4 1.7608(19) . ?
Fe2 C3 1.7769(19) . ?
Fe2 P2 2.2275(5) . ?
Fe2 S1 2.2585(5) . ?
Fe2 S2 2.2692(5) . ?
P1 C14 1.8306(19) . ?
P1 C8 1.8403(19) . ?
P1 C7 1.8514(18) . ?
P2 C26 1.8285(18) . ?
P2 C20 1.8348(18) . ?
P2 C7 1.8565(17) . ?
S1 C5 1.8186(19) . ?
S2 C6 1.827(2) . ?
O1 C1 1.139(3) . ?
O2 C2 1.152(2) . ?
O3 C3 1.149(2) . ?
O4 C4 1.154(2) . ?
C8 C13 1.395(3) . ?
C8 C9 1.401(3) . ?
C9 C10 1.392(3) . ?
C10 C11 1.384(3) . ?
C11 C12 1.392(3) . ?
C12 C13 1.393(3) . ?
C14 C19 1.391(3) . ?
C14 C15 1.406(3) . ?
C15 C16 1.390(3) . ?
C16 C17 1.388(3) . ?
C17 C18 1.384(3) . ?
C18 C19 1.398(3) . ?
C20 C25 1.398(3) . ?
C20 C21 1.401(3) . ?
C21 C22 1.384(3) . ?
C22 C23 1.383(3) . ?
C23 C24 1.384(3) . ?
C24 C25 1.388(3) . ?
C26 C31 1.395(3) . ?
C26 C27 1.401(3) . ?
C27 C28 1.395(3) . ?
C28 C29 1.387(3) . ?
C29 C30 1.379(3) . ?
C30 C31 1.397(3) . ?

loop_
 _geom_angle_atom_site_label_1
 _geom_angle_atom_site_label_2
 _geom_angle_atom_site_label_3
 _geom_angle
 _geom_angle_site_symmetry_1
 _geom_angle_site_symmetry_3
 _geom_angle_publ_flag
C2 Fe1 C1 97.27(9) . . ?
C2 Fe1 P1 92.49(6) . . ?
C1 Fe1 P1 98.26(7) . . ?
C2 Fe1 S1 92.76(7) . . ?
C1 Fe1 S1 103.83(7) . . ?
P1 Fe1 S1 156.44(2) . . ?
C2 Fe1 S2 152.02(7) . . ?
C1 Fe1 S2 110.69(7) . . ?
P1 Fe1 S2 84.542(19) . . ?
S1 Fe1 S2 80.102(18) . . ?
C2 Fe1 Fe2 97.37(7) . . ?
C1 Fe1 Fe2 155.72(7) . . ?
P1 Fe1 Fe2 100.343(16) . . ?
S1 Fe1 Fe2 56.190(14) . . ?
S2 Fe1 Fe2 56.186(13) . . ?
C4 Fe2 C3 97.66(8) . . ?
C4 Fe2 P2 92.60(6) . . ?
C3 Fe2 P2 102.63(6) . . ?
C4 Fe2 S1 92.69(6) . . ?
C3 Fe2 S1 108.20(6) . . ?
P2 Fe2 S1 147.68(2) . . ?
C4 Fe2 S2 169.18(6) . . ?
C3 Fe2 S2 92.38(6) . . ?
P2 Fe2 S2 89.094(19) . . ?
S1 Fe2 S2 80.304(19) . . ?
C4 Fe2 Fe1 112.53(6) . . ?
C3 Fe2 Fe1 145.48(6) . . ?
P2 Fe2 Fe1 92.673(16) . . ?
S1 Fe2 Fe1 56.038(14) . . ?
S2 Fe2 Fe1 56.697(14) . . ?
C14 P1 C8 101.14(8) . . ?
C14 P1 C7 106.93(8) . . ?
C8 P1 C7 101.81(8) . . ?
C14 P1 Fe1 116.60(6) . . ?
C8 P1 Fe1 118.18(6) . . ?
C7 P1 Fe1 110.60(6) . . ?
C26 P2 C20 100.73(8) . . ?
C26 P2 C7 104.52(8) . . ?
C20 P2 C7 101.24(8) . . ?
C26 P2 Fe2 114.87(6) . . ?
C20 P2 Fe2 120.11(6) . . ?
C7 P2 Fe2 113.23(6) . . ?
C5 S1 Fe1 114.74(7) . . ?
C5 S1 Fe2 114.15(7) . . ?
Fe1 S1 Fe2 67.772(15) . . ?
C6 S2 Fe2 110.11(7) . . ?
C6 S2 Fe1 115.20(7) . . ?
Fe2 S2 Fe1 67.117(15) . . ?
O1 C1 Fe1 176.1(2) . . ?
O2 C2 Fe1 178.17(18) . . ?
O3 C3 Fe2 175.56(16) . . ?
O4 C4 Fe2 177.97(18) . . ?
P1 C7 P2 110.57(9) . . ?
C13 C8 C9 118.66(17) . . ?
C13 C8 P1 120.55(14) . . ?
C9 C8 P1 120.79(14) . . ?
C10 C9 C8 120.48(18) . . ?
C11 C10 C9 120.39(19) . . ?
C10 C11 C12 119.71(18) . . ?
C11 C12 C13 120.05(19) . . ?
C12 C13 C8 120.71(18) . . ?
C19 C14 C15 118.58(17) . . ?
C19 C14 P1 124.93(14) . . ?
C15 C14 P1 116.42(14) . . ?
C16 C15 C14 120.60(19) . . ?
C17 C16 C15 120.35(18) . . ?
C18 C17 C16 119.43(19) . . ?
C17 C18 C19 120.69(19) . . ?
C14 C19 C18 120.32(18) . . ?
C25 C20 C21 118.80(17) . . ?
C25 C20 P2 119.07(14) . . ?
C21 C20 P2 121.97(14) . . ?
C22 C21 C20 120.27(18) . . ?
C23 C22 C21 120.38(18) . . ?
C22 C23 C24 120.06(18) . . ?
C23 C24 C25 120.03(19) . . ?
C24 C25 C20 120.45(18) . . ?
C31 C26 C27 118.81(17) . . ?
C31 C26 P2 124.94(14) . . ?
C27 C26 P2 116.25(14) . . ?
C28 C27 C26 120.68(18) . . ?
C29 C28 C27 119.69(18) . . ?
C30 C29 C28 120.21(18) . . ?
C29 C30 C31 120.43(19) . . ?
C26 C31 C30 120.18(18) . . ?

loop_
 _geom_torsion_atom_site_label_1
 _geom_torsion_atom_site_label_2
 _geom_torsion_atom_site_label_3
 _geom_torsion_atom_site_label_4
 _geom_torsion
 _geom_torsion_site_symmetry_1
 _geom_torsion_site_symmetry_2
 _geom_torsion_site_symmetry_3
 _geom_torsion_site_symmetry_4
 _geom_torsion_publ_flag
C2 Fe1 Fe2 C4 10.98(9) . . . . ?
C1 Fe1 Fe2 C4 -115.69(18) . . . . ?
P1 Fe1 Fe2 C4 104.89(7) . . . . ?
S1 Fe1 Fe2 C4 -77.40(7) . . . . ?
S2 Fe1 Fe2 C4 -178.91(7) . . . . ?
C2 Fe1 Fe2 C3 160.04(12) . . . . ?
C1 Fe1 Fe2 C3 33.4(2) . . . . ?
P1 Fe1 Fe2 C3 -106.05(10) . . . . ?
S1 Fe1 Fe2 C3 71.66(11) . . . . ?
S2 Fe1 Fe2 C3 -29.85(10) . . . . ?
C2 Fe1 Fe2 P2 -82.95(6) . . . . ?
C1 Fe1 Fe2 P2 150.38(17) . . . . ?
P1 Fe1 Fe2 P2 10.961(19) . . . . ?
S1 Fe1 Fe2 P2 -171.33(2) . . . . ?
S2 Fe1 Fe2 P2 87.16(2) . . . . ?
C2 Fe1 Fe2 S1 88.39(6) . . . . ?
C1 Fe1 Fe2 S1 -38.29(17) . . . . ?
P1 Fe1 Fe2 S1 -177.71(2) . . . . ?
S2 Fe1 Fe2 S1 -101.51(2) . . . . ?
C2 Fe1 Fe2 S2 -170.10(7) . . . . ?
C1 Fe1 Fe2 S2 63.22(17) . . . . ?
P1 Fe1 Fe2 S2 -76.19(2) . . . . ?
S1 Fe1 Fe2 S2 101.51(2) . . . . ?
C2 Fe1 P1 C14 -16.13(9) . . . . ?
C1 Fe1 P1 C14 81.59(9) . . . . ?
S1 Fe1 P1 C14 -118.87(8) . . . . ?
S2 Fe1 P1 C14 -168.24(7) . . . . ?
Fe2 Fe1 P1 C14 -114.10(7) . . . . ?
C2 Fe1 P1 C8 -137.02(9) . . . . ?
C1 Fe1 P1 C8 -39.30(10) . . . . ?
S1 Fe1 P1 C8 120.24(8) . . . . ?
S2 Fe1 P1 C8 70.87(7) . . . . ?
Fe2 Fe1 P1 C8 125.02(7) . . . . ?
C2 Fe1 P1 C7 106.28(9) . . . . ?
C1 Fe1 P1 C7 -155.99(9) . . . . ?
S1 Fe1 P1 C7 3.55(9) . . . . ?
S2 Fe1 P1 C7 -45.83(6) . . . . ?
Fe2 Fe1 P1 C7 8.32(6) . . . . ?
C4 Fe2 P2 C26 97.75(9) . . . . ?
C3 Fe2 P2 C26 -0.70(9) . . . . ?
S1 Fe2 P2 C26 -163.06(7) . . . . ?
S2 Fe2 P2 C26 -92.94(7) . . . . ?
Fe1 Fe2 P2 C26 -149.54(6) . . . . ?
C4 Fe2 P2 C20 -22.65(9) . . . . ?
C3 Fe2 P2 C20 -121.10(9) . . . . ?
S1 Fe2 P2 C20 76.54(8) . . . . ?
S2 Fe2 P2 C20 146.66(7) . . . . ?
Fe1 Fe2 P2 C20 90.06(7) . . . . ?
C4 Fe2 P2 C7 -142.26(9) . . . . ?
C3 Fe2 P2 C7 119.28(9) . . . . ?
S1 Fe2 P2 C7 -43.07(8) . . . . ?
S2 Fe2 P2 C7 27.04(6) . . . . ?
Fe1 Fe2 P2 C7 -29.56(6) . . . . ?
C2 Fe1 S1 C5 10.32(10) . . . . ?
C1 Fe1 S1 C5 -87.86(10) . . . . ?
P1 Fe1 S1 C5 113.01(9) . . . . ?
S2 Fe1 S1 C5 163.09(8) . . . . ?
Fe2 Fe1 S1 C5 107.35(8) . . . . ?
C2 Fe1 S1 Fe2 -97.03(6) . . . . ?
C1 Fe1 S1 Fe2 164.79(7) . . . . ?
P1 Fe1 S1 Fe2 5.65(5) . . . . ?
S2 Fe1 S1 Fe2 55.735(15) . . . . ?
C4 Fe2 S1 C5 7.32(10) . . . . ?
C3 Fe2 S1 C5 106.29(10) . . . . ?
P2 Fe2 S1 C5 -91.85(8) . . . . ?
S2 Fe2 S1 C5 -164.38(8) . . . . ?
Fe1 Fe2 S1 C5 -108.20(8) . . . . ?
C4 Fe2 S1 Fe1 115.52(6) . . . . ?
C3 Fe2 S1 Fe1 -145.51(6) . . . . ?
P2 Fe2 S1 Fe1 16.35(4) . . . . ?
S2 Fe2 S1 Fe1 -56.184(16) . . . . ?
C4 Fe2 S2 C6 -104.4(3) . . . . ?
C3 Fe2 S2 C6 53.87(9) . . . . ?
P2 Fe2 S2 C6 156.48(8) . . . . ?
S1 Fe2 S2 C6 -54.19(8) . . . . ?
Fe1 Fe2 S2 C6 -109.73(8) . . . . ?
C4 Fe2 S2 Fe1 5.4(3) . . . . ?
C3 Fe2 S2 Fe1 163.60(6) . . . . ?
P2 Fe2 S2 Fe1 -93.796(17) . . . . ?
S1 Fe2 S2 Fe1 55.538(16) . . . . ?
C2 Fe1 S2 C6 123.66(16) . . . . ?
C1 Fe1 S2 C6 -54.54(11) . . . . ?
P1 Fe1 S2 C6 -151.32(8) . . . . ?
S1 Fe1 S2 C6 46.61(8) . . . . ?
Fe2 Fe1 S2 C6 102.35(8) . . . . ?
C2 Fe1 S2 Fe2 21.31(14) . . . . ?
C1 Fe1 S2 Fe2 -156.89(8) . . . . ?
P1 Fe1 S2 Fe2 106.325(17) . . . . ?
S1 Fe1 S2 Fe2 -55.739(16) . . . . ?
C2 Fe1 C1 O1 13(3) . . . . ?
P1 Fe1 C1 O1 -80(3) . . . . ?
S1 Fe1 C1 O1 108(3) . . . . ?
S2 Fe1 C1 O1 -168(3) . . . . ?
Fe2 Fe1 C1 O1 140(3) . . . . ?
C1 Fe1 C2 O2 96(6) . . . . ?
P1 Fe1 C2 O2 -166(6) . . . . ?
S1 Fe1 C2 O2 -9(6) . . . . ?
S2 Fe1 C2 O2 -83(6) . . . . ?
Fe2 Fe1 C2 O2 -65(6) . . . . ?
C4 Fe2 C3 O3 -175(2) . . . . ?
P2 Fe2 C3 O3 -81(2) . . . . ?
S1 Fe2 C3 O3 90(2) . . . . ?
S2 Fe2 C3 O3 9(2) . . . . ?
Fe1 Fe2 C3 O3 34(2) . . . . ?
C3 Fe2 C4 O4 -72(5) . . . . ?
P2 Fe2 C4 O4 -175(100) . . . . ?
S1 Fe2 C4 O4 37(5) . . . . ?
S2 Fe2 C4 O4 86(5) . . . . ?
Fe1 Fe2 C4 O4 91(5) . . . . ?
C14 P1 C7 P2 98.69(10) . . . . ?
C8 P1 C7 P2 -155.65(9) . . . . ?
Fe1 P1 C7 P2 -29.22(10) . . . . ?
C26 P2 C7 P1 166.17(9) . . . . ?
C20 P2 C7 P1 -89.50(10) . . . . ?
Fe2 P2 C7 P1 40.44(10) . . . . ?
C14 P1 C8 C13 42.50(17) . . . . ?
C7 P1 C8 C13 -67.64(17) . . . . ?
Fe1 P1 C8 C13 171.05(13) . . . . ?
C14 P1 C8 C9 -137.86(16) . . . . ?
C7 P1 C8 C9 112.00(16) . . . . ?
Fe1 P1 C8 C9 -9.31(18) . . . . ?
C13 C8 C9 C10 -0.2(3) . . . . ?
P1 C8 C9 C10 -179.84(15) . . . . ?
C8 C9 C10 C11 0.1(3) . . . . ?
C9 C10 C11 C12 0.3(3) . . . . ?
C10 C11 C12 C13 -0.5(3) . . . . ?
C11 C12 C13 C8 0.4(3) . . . . ?
C9 C8 C13 C12 0.0(3) . . . . ?
P1 C8 C13 C12 179.60(15) . . . . ?
C8 P1 C14 C19 -117.07(16) . . . . ?
C7 P1 C14 C19 -10.94(18) . . . . ?
Fe1 P1 C14 C19 113.37(15) . . . . ?
C8 P1 C14 C15 66.00(15) . . . . ?
C7 P1 C14 C15 172.13(14) . . . . ?
Fe1 P1 C14 C15 -63.56(15) . . . . ?
C19 C14 C15 C16 0.8(3) . . . . ?
P1 C14 C15 C16 177.96(15) . . . . ?
C14 C15 C16 C17 -1.5(3) . . . . ?
C15 C16 C17 C18 0.8(3) . . . . ?
C16 C17 C18 C19 0.7(3) . . . . ?
C15 C14 C19 C18 0.6(3) . . . . ?
P1 C14 C19 C18 -176.25(15) . . . . ?
C17 C18 C19 C14 -1.4(3) . . . . ?
C26 P2 C20 C25 32.49(16) . . . . ?
C7 P2 C20 C25 -74.84(15) . . . . ?
Fe2 P2 C20 C25 159.70(12) . . . . ?
C26 P2 C20 C21 -152.13(15) . . . . ?
C7 P2 C20 C21 100.54(15) . . . . ?
Fe2 P2 C20 C21 -24.92(17) . . . . ?
C25 C20 C21 C22 -0.2(3) . . . . ?
P2 C20 C21 C22 -175.58(15) . . . . ?
C20 C21 C22 C23 -0.6(3) . . . . ?
C21 C22 C23 C24 0.9(3) . . . . ?
C22 C23 C24 C25 -0.4(3) . . . . ?
C23 C24 C25 C20 -0.4(3) . . . . ?
C21 C20 C25 C24 0.7(3) . . . . ?
P2 C20 C25 C24 176.23(15) . . . . ?
C20 P2 C26 C31 -103.12(17) . . . . ?
C7 P2 C26 C31 1.60(19) . . . . ?
Fe2 P2 C26 C31 126.29(15) . . . . ?
C20 P2 C26 C27 76.06(16) . . . . ?
C7 P2 C26 C27 -179.22(14) . . . . ?
Fe2 P2 C26 C27 -54.53(16) . . . . ?
C31 C26 C27 C28 -0.4(3) . . . . ?
P2 C26 C27 C28 -179.62(16) . . . . ?
C26 C27 C28 C29 -0.6(3) . . . . ?
C27 C28 C29 C30 1.0(3) . . . . ?
C28 C29 C30 C31 -0.5(3) . . . . ?
C27 C26 C31 C30 0.9(3) . . . . ?
P2 C26 C31 C30 -179.95(15) . . . . ?
C29 C30 C31 C26 -0.4(3) . . . . ?

_diffrn_measured_fraction_theta_max    0.888
_diffrn_reflns_theta_full              26.00
_diffrn_measured_fraction_theta_full   0.972
_refine_diff_density_max    0.542
_refine_diff_density_min   -0.591
_refine_diff_density_rms    0.076
